# Supplementary material
Source: PubMed Central journal article supplement (PMC2874472)
Supplement: fj.09-147942_1.pdf [file fj.09-147942_1.pdf]

**Supplementary Table S-1. Summary of peptidomics results of *pcd* mice versus wild-type mice.** Abbreviations: Cyto, cytosolic; Lyso, lysosomal; Memb, membrane; Mito, mitochondrial; Ac, acetyl; Mox, methionine oxide; z, charge; #T, number of isotopic tags incorporated into peptide; Obs. Mass, observed mass (note; most masses are monoisotopic, exceptions are in italics, which are average masses); Theor. mass, theoretical mass; WT/WT Avg and SD, average ratio and standard deviation of peptide among WT groups in replicate; *pcd*/WT Avg and SD, average ratio and standard deviation of peptide level in *pcd* groups, relative to WT groups in replicate; ND, not detected. Color and group: dark green, ratio <0.33 (group 1); light green, ratio 0.33-0.66 (group 2); yellow, ratio 0.67-1.49 (group 3); light red, ratio 1.50-3.0 (group 4); bright red, ratio >3.0 (group 5). Parenthesis around the amino acid sequence indicate tentative identification, all others were confirmed by MS/MS sequencing.

| Precursor                             | Sub-cellular Location | Peptide name or region | Peptide sequence   | Region       | z | #T | Obs Mass | Theor Mass | WT/WT |      | <i>pcd</i> /WT |      | Group |
|---------------------------------------|-----------------------|------------------------|--------------------|--------------|---|----|----------|------------|-------|------|----------------|------|-------|
|                                       |                       |                        |                    |              |   |    |          |            | Avg   | SD   | Avg            | SD   |       |
| Actin (beta or gamma)                 | Cyto                  | 170-178 of gamma       | LPHAILRL           | Amygdala     | 3 | 1  | 931.55   | 931.60     | nd    |      | >5             |      | 5     |
| Actin (beta or gamma)                 | Cyto                  | 170-178 of gamma       | LPHAILRL           | Amygdala     | 3 | 1  | 931.60   | 931.60     | nd    |      | >5             |      | 5     |
| Actin (beta or gamma)                 | Cyto                  | 170-178 of gamma       | LPHAILRL           | Hypothalamus | 3 | 1  | 931.59   | 931.60     | nd    |      | >5             |      | 5     |
| Actin (beta or gamma)                 | Cyto                  | 170-178 of gamma       | ALPHAILRL          | Amygdala     | 3 | 1  | 1002.59  | 1002.64    | 1.11  | 0.63 | 3.38           | 0.38 | 5     |
| Actin (beta or gamma)                 | Cyto                  | 170-178 of gamma       | ALPHAILRL          | Hypothalamus | 3 | 1  | 1002.64  | 1002.64    | 1.00  | 0.06 | 2.06           | 0.17 | 4     |
| Actin (beta or gamma)                 | Cyto                  | 95-108                 | RVAPEEHPVLLTEA     | Amygdala     | 3 | 1  | 1559.88  | 1559.83    | nd    |      | >5             |      | 5     |
| Actin (beta or gamma)                 | Cyto                  | 95-108                 | RVAPEEHPVLLTEA     | Cortex       | 3 | 1  | 1559.86  | 1559.83    | nd    |      | >5             |      | 5     |
| Actin (beta or gamma)                 | Cyto                  | 95-108                 | RVAPEEHPVLLTEA     | Hypothalamus | 3 | 1  | 1559.84  | 1559.83    | nd    |      | >5             |      | 5     |
| Actin (beta or gamma)                 | Cyto                  | 95-108                 | RVAPEEHPVLLTEA     | Hypothalamus | 3 | 1  | 1559.86  | 1559.83    | nd    |      | >5             |      | 5     |
| Actin (beta or gamma)                 | Cyto                  | 95-108                 | RVAPEEHPVLLTEA     | Striatum     | 3 | 1  | 1559.85  | 1559.83    | nd    |      | >5             |      | 5     |
| ATP synthase subunit d, mitochondrial | Mito                  | N-term                 | Ac-AGRKLALKTIDWVSF | Amygdala     | 3 | 2  | 1746.00  | 1745.98    | nd    |      | >5             |      | 5     |
| ATP Synthase, subunit F               | Mito                  | C-term                 | PKFEVIDKPQS        | Hypothalamus | 3 | 2  | 1286.69  | 1286.69    | nd    |      | >5             |      | 5     |
| ATP Synthase, subunit F               | Mito                  | C-term                 | PKFEVIDKPQS        | Hypothalamus | 3 | 2  | 1286.71  | 1286.69    | nd    |      | >5             |      | 5     |
| ATP Synthase, subunit F               | Mito                  | 97-109                 | GKGEMDTFPTFKF      | Amygdala     | 3 | 2  | 1503.65  | 1503.71    | nd    |      | >5             |      | 5     |
| ATP Synthase, subunit F               | Mito                  | 97-109                 | GKGEMDTFPTFKF      | Cortex       | 3 | 3  | 1503.69  | 1503.71    | nd    |      | >5             |      | 5     |
| ATP Synthase, subunit F               | Mito                  | 97-109                 | GKGEMDTFPTFKF      | Hypothalamus | 3 | 2  | 1503.68  | 1503.71    | nd    |      | >5             |      | 5     |
| ATP Synthase, subunit F               | Mito                  | 97-109                 | GKGEMDTFPTFKF      | Hypothalamus | 3 | 3  | 1503.70  | 1503.71    | nd    |      | >5             |      | 5     |
| ATP Synthase, subunit F               | Mito                  | C-term                 | DDPKFEVIDKPQS      | Amygdala     | 2 | 2  | 1516.72  | 1516.74    | nd    |      | >5             |      | 5     |
| ATP Synthase, subunit F               | Mito                  | C-term                 | DDPKFEVIDKPQS      | Amygdala     | 2 | 2  | 1516.73  | 1516.74    | nd    |      | >5             |      | 5     |

|                         |      |                                       |                                                                                                                                                            |                   |    |   |          |          |      |      |      |      |   |
|-------------------------|------|---------------------------------------|------------------------------------------------------------------------------------------------------------------------------------------------------------|-------------------|----|---|----------|----------|------|------|------|------|---|
| ATP Synthase, subunit F | Mito | C-term                                | DDPKFEVIDKPQS                                                                                                                                              | Amygdala          | 3  | 2 | 1516.65  | 1516.74  | nd   |      | >5   |      | 5 |
| ATP Synthase, subunit F | Mito | C-term                                | DDPKFEVIDKPQS                                                                                                                                              | Amygdala          | 3  | 3 | 1516.69  | 1516.74  | nd   |      | >3   |      | 5 |
| ATP Synthase, subunit F | Mito | C-term                                | DDPKFEVIDKPQS                                                                                                                                              | Amygdala          | 3  | 3 | 1516.71  | 1516.74  | nd   |      | >5   |      | 5 |
| ATP Synthase, subunit F | Mito | C-term                                | DDPKFEVIDKPQS                                                                                                                                              | Cortex            | 3  | 3 | 1516.72  | 1516.74  | nd   |      | >5   |      | 5 |
| ATP Synthase, subunit F | Mito | C-term                                | DDPKFEVIDKPQS                                                                                                                                              | Hypothalamus      | 2  | 2 | 1516.78  | 1516.74  | nd   |      | >5   |      | 5 |
| ATP Synthase, subunit F | Mito | C-term                                | DDPKFEVIDKPQS                                                                                                                                              | Hypothalamus      | 3  | 2 | 1516.72  | 1516.74  | nd   |      | >5   |      | 5 |
| ATP Synthase, subunit F | Mito | C-term                                | DDPKFEVIDKPQS                                                                                                                                              | Hypothalamus      | 3  | 2 | 1516.74  | 1516.74  | nd   |      | >5   |      | 5 |
| ATP Synthase, subunit F | Mito | C-term                                | DDPKFEVIDKPQS                                                                                                                                              | Hypothalamus      | 3  | 2 | 1516.75  | 1516.74  | nd   |      | >5   |      | 5 |
| ATP Synthase, subunit F | Mito | C-term                                | DDPKFEVIDKPQS                                                                                                                                              | Hypothalamus      | 3  | 3 | 1516.73  | 1516.74  | nd   |      | >5   |      | 5 |
| ATP Synthase, subunit F | Mito | C-term                                | DDPKFEVIDKPQS                                                                                                                                              | Hypothalamus      | 3  | 3 | 1516.75  | 1516.74  | nd   |      | >5   |      | 5 |
| ATP Synthase, subunit F | Mito | C-term                                | DDPKFEVIDKPQS                                                                                                                                              | Prefrontal Cortex | 3  | 3 | 1516.74  | 1516.74  | nd   |      | >5   |      | 5 |
| ATP Synthase, subunit F | Mito | C-term                                | DDPKFEVIDKPQS                                                                                                                                              | Striatum          | 3  | 3 | 1516.73  | 1516.74  | nd   |      | >5   |      | 5 |
| ATP Synthase, subunit F | Mito | C-term                                | KFDDPKFEVIDKPQS                                                                                                                                            | Amygdala          | 4  | 3 | 1791.84  | 1791.90  | nd   |      | >5   |      | 5 |
| ATP Synthase, subunit F | Mito | C-term                                | KFDDPKFEVIDKPQS                                                                                                                                            | Cortex            | 4  | 4 | 1791.92  | 1791.90  | nd   |      | >5   |      | 5 |
| ATP Synthase, subunit F | Mito | C-term                                | KFDDPKFEVIDKPQS                                                                                                                                            | Hypothalamus      | 4  | 3 | 1791.92  | 1791.90  | nd   |      | >5   |      | 5 |
| ATP Synthase, subunit F | Mito | C-term                                | KFDDPKFEVIDKPQS                                                                                                                                            | Hypothalamus      | 4  | 4 | 1791.90  | 1791.90  | nd   |      | >5   |      | 5 |
| ATP Synthase, subunit F | Mito | C-term                                | KFDDPKFEVIDKPQS                                                                                                                                            | Striatum          | 4  | 4 | 1791.94  | 1791.90  | nd   |      | >5   |      | 5 |
| ATP Synthase, subunit F | Mito | C-term                                | PTFKFDDPKFEVIDKPQS                                                                                                                                         | Amygdala          | 4  | 3 | 2137.04  | 2137.06  | nd   |      | >5   |      | 5 |
| ATP Synthase, subunit F | Mito | C-term                                | PTFKFDDPKFEVIDKPQS                                                                                                                                         | Amygdala          | 4  | 4 | 2137.01  | 2137.06  | nd   |      | >5   |      | 5 |
| ATP Synthase, subunit F | Mito | C-term                                | PTFKFDDPKFEVIDKPQS                                                                                                                                         | Hypothalamus      | 4  | 3 | 2137.04  | 2137.06  | nd   |      | >5   |      | 5 |
| ATP Synthase, subunit F | Mito | C-term                                | PTFKFDDPKFEVIDKPQS                                                                                                                                         | Striatum          | 4  | 4 | 2137.08  | 2137.06  | nd   |      | >5   |      | 5 |
| Calmodulin              | Cyto | Entire protein, with trimethyl-Lys115 | Ac-ADQLTEEQIAEFKEAFSLFDKDGDDGTITTKELGTVMR SLGQNPTEAELQDMINEVDADGNGTIDFPEFLTMMARKM KDTDSEEEIREFRVFDKDGNGYISAAELRHVMTNLGEK LTDEEVDEMIREADIDGGDQVNYEEFVQMMTAK | Amygdala          | 11 | 7 | 16790.03 | 16790.54 | 1.00 | 0.11 | 0.83 | 0.04 | 3 |
| Calmodulin              | Cyto | Entire protein, with trimethyl-Lys115 | Ac-ADQLTEEQIAEFKEAFSLFDKDGDDGTITTKELGTVMR SLGQNPTEAELQDMINEVDADGNGTIDFPEFLTMMARKM KDTDSEEEIREFRVFDKDGNGYISAAELRHVMTNLGEK LTDEEVDEMIREADIDGGDQVNYEEFVQMMTAK | Amygdala          | 11 | 7 | 16790.53 | 16790.54 | 1.03 | 0.32 | 0.85 | 0.13 | 3 |
| Calmodulin              | Cyto | Entire protein, with trimethyl-Lys115 | Ac-ADQLTEEQIAEFKEAFSLFDKDGDDGTITTKELGTVMR SLGQNPTEAELQDMINEVDADGNGTIDFPEFLTMMARKM KDTDSEEEIREFRVFDKDGNGYISAAELRHVMTNLGEK LTDEEVDEMIREADIDGGDQVNYEEFVQMMTAK | Amygdala          | 12 | 7 | 16789.51 | 16790.54 | 1.00 | 0.09 | 0.79 | 0.00 | 3 |
| Calmodulin              | Cyto | Entire protein, with                  | Ac-ADQLTEEQIAEFKEAFSLFDKDGDDGTITTKELGTVMR SLGQNPTEAELQDMINEVDADGNGTIDFPEFLTMMARKM KDTDSEEEIREFRVFDKDGNGYISAAELRHVMTNLGEK                                   | Amygdala          | 12 | 7 | 16790.63 | 16790.54 | 1.04 | 0.33 | 0.81 | 0.12 | 3 |

|                        |      |                                       |                                                                                                                                                                   |                   |    |   |          |          |      |      |      |      |   |
|------------------------|------|---------------------------------------|-------------------------------------------------------------------------------------------------------------------------------------------------------------------|-------------------|----|---|----------|----------|------|------|------|------|---|
|                        |      | trimethyl-Lys115                      | LTDEEVDEMIREADIDGGQVNYEEFVQMMTAK                                                                                                                                  |                   |    |   |          |          |      |      |      |      |   |
| Calmodulin             | Cyto | Entire protein, with trimethyl-Lys115 | Ac-ADQLTEEQIAEFKEAFSLFDKDGDTITTKELGTVMR<br>SLGQNPTEAELQDMINEVDADGNGTIDFPEFLTMMARKM<br>KDTDSEEEIREAFRVFDKDGNGYISAAELRHVMTNLGEK<br>LTDEEVDEMIREADIDGGQVNYEEFVQMMTAK | Amygdala          | 13 | 7 | 16789.41 | 16790.54 | 1.01 | 0.12 | 0.78 | 0.07 | 3 |
| Calmodulin             | Cyto | Entire protein, with trimethyl-Lys115 | Ac-ADQLTEEQIAEFKEAFSLFDKDGDTITTKELGTVMR<br>SLGQNPTEAELQDMINEVDADGNGTIDFPEFLTMMARKM<br>KDTDSEEEIREAFRVFDKDGNGYISAAELRHVMTNLGEK<br>LTDEEVDEMIREADIDGGQVNYEEFVQMMTAK | Amygdala          | 13 | 7 | 16790.03 | 16790.54 | 1.03 | 0.27 | 0.79 | 0.11 | 3 |
| Calmodulin             | Cyto | Entire protein, with trimethyl-Lys115 | Ac-ADQLTEEQIAEFKEAFSLFDKDGDTITTKELGTVMR<br>SLGQNPTEAELQDMINEVDADGNGTIDFPEFLTMMARKM<br>KDTDSEEEIREAFRVFDKDGNGYISAAELRHVMTNLGEK<br>LTDEEVDEMIREADIDGGQVNYEEFVQMMTAK | Amygdala          | 14 | 7 | 16789.06 | 16790.54 | 1.00 | 0.10 | 0.88 | 0.03 | 3 |
| Calmodulin             | Cyto | Entire protein, with trimethyl-Lys115 | Ac-ADQLTEEQIAEFKEAFSLFDKDGDTITTKELGTVMR<br>SLGQNPTEAELQDMINEVDADGNGTIDFPEFLTMMARKM<br>KDTDSEEEIREAFRVFDKDGNGYISAAELRHVMTNLGEK<br>LTDEEVDEMIREADIDGGQVNYEEFVQMMTAK | Amygdala          | 14 | 7 | 16790.01 | 16790.54 | 1.03 | 0.28 | 0.86 | 0.14 | 3 |
| Calmodulin             | Cyto | Entire protein, with trimethyl-Lys115 | Ac-ADQLTEEQIAEFKEAFSLFDKDGDTITTKELGTVMR<br>SLGQNPTEAELQDMINEVDADGNGTIDFPEFLTMMARKM<br>KDTDSEEEIREAFRVFDKDGNGYISAAELRHVMTNLGEK<br>LTDEEVDEMIREADIDGGQVNYEEFVQMMTAK | Amygdala          | 15 | 7 | 16789.55 | 16790.54 | 1.01 | 0.14 | 0.80 | 0.07 | 3 |
| Calmodulin             | Cyto | Entire protein, with trimethyl-Lys115 | Ac-ADQLTEEQIAEFKEAFSLFDKDGDTITTKELGTVMR<br>SLGQNPTEAELQDMINEVDADGNGTIDFPEFLTMMARKM<br>KDTDSEEEIREAFRVFDKDGNGYISAAELRHVMTNLGEK<br>LTDEEVDEMIREADIDGGQVNYEEFVQMMTAK | Amygdala          | 15 | 7 | 16790.15 | 16790.54 | 1.03 | 0.27 | 0.88 | 0.15 | 3 |
| Calmodulin             | Cyto | Entire protein, with trimethyl-Lys115 | Ac-ADQLTEEQIAEFKEAFSLFDKDGDTITTKELGTVMR<br>SLGQNPTEAELQDMINEVDADGNGTIDFPEFLTMMARKM<br>KDTDSEEEIREAFRVFDKDGNGYISAAELRHVMTNLGEK<br>LTDEEVDEMIREADIDGGQVNYEEFVQMMTAK | Amygdala          | 16 | 7 | 16789.68 | 16790.54 | 1.00 | 0.10 | 0.78 | 0.10 | 3 |
| Calmodulin             | Cyto | Entire protein, with trimethyl-Lys115 | Ac-ADQLTEEQIAEFKEAFSLFDKDGDTITTKELGTVMR<br>SLGQNPTEAELQDMINEVDADGNGTIDFPEFLTMMARKM<br>KDTDSEEEIREAFRVFDKDGNGYISAAELRHVMTNLGEK<br>LTDEEVDEMIREADIDGGQVNYEEFVQMMTAK | Amygdala          | 16 | 7 | 16790.13 | 16790.54 | 1.01 | 0.20 | 0.85 | 0.15 | 3 |
| Cathepsin D            | Lyso | 138-155                               | YTVFDRDNNRVGFANAVV                                                                                                                                                | Hypothalamus      | 3  | 1 | 2056.01  | 2056.01  | 1.03 | 0.33 | 0.74 | 0.05 | 3 |
| Clathrin light chain A | Cyto | C-term                                | KQAPLVH                                                                                                                                                           | Prefrontal Cortex | 3  | 2 | 791.47   | 791.47   | 1.11 | 0.63 | 4.91 | 1.23 | 5 |
| Clathrin light chain A | Cyto | C-term                                | KQAPLVH                                                                                                                                                           | Cortex            | 3  | 2 | 791.48   | 791.47   | nd   |      | >5   |      | 5 |
| Clathrin light chain A | Cyto | C-term                                | KQAPLVH                                                                                                                                                           | Striatum          | 3  | 2 | 791.49   | 791.47   | 1.02 | 0.21 | 4.33 | 0.87 | 5 |
| Clathrin light chain A | Cyto | C-term                                | SLKQAPLVH                                                                                                                                                         | Amygdala          | 3  | 1 | 991.58   | 991.59   | nd   |      | >5   |      | 5 |
| Clathrin light chain A | Cyto | C-term                                | SLKQAPLVH                                                                                                                                                         | Cortex            | 3  | 2 | 991.54   | 991.59   | nd   |      | >5   |      | 5 |
| Clathrin light chain A | Cyto | C-term                                | SLKQAPLVH                                                                                                                                                         | Hypothalamus      | 3  | 1 | 991.59   | 991.59   | 1.06 | 0.42 | 6.50 | 4.17 | 5 |

|                                         |      |         |                          |                   |   |   |         |         |      |      |      |      |   |
|-----------------------------------------|------|---------|--------------------------|-------------------|---|---|---------|---------|------|------|------|------|---|
| Clathrin light chain A                  | Cyto | C-term  | SLKQAPLVH                | Prefrontal Cortex | 3 | 2 | 991.59  | 991.59  | nd   |      | >5   |      | 5 |
| Clathrin light chain A                  | Cyto | C-term  | SLKQAPLVH                | Striatum          | 3 | 2 | 991.55  | 991.59  | nd   |      | >5   |      | 5 |
| Clathrin light chain A                  | Cyto | C-term  | SVLISLKQAPLVH            | Amygdala          | 3 | 1 | 1403.81 | 1403.85 | nd   |      | >5   |      | 5 |
| Clathrin light chain A                  | Cyto | C-term  | SVLISLKQAPLVH            | Hypothalamus      | 3 | 1 | 1403.85 | 1403.85 | 1.01 | 0.14 | 4.59 | 1.41 | 5 |
| Clathrin light chain A                  | Cyto | 164-187 | AEEAFVNDIDESSPGTEWERVERL | Amygdala          | 3 | 1 | 2719.33 | 2719.27 | nd   |      | >5   |      | 5 |
| Clathrin light chain B                  | Cyto | C-term  | KQTPLSR                  | Prefrontal Cortex | 3 | 2 | 828.48  | 828.48  | nd   |      | >3   |      | 5 |
| Clathrin light chain B                  | Cyto | C-term  | KQTPLSR                  | Striatum          | 3 | 2 | 828.50  | 828.48  | nd   |      | >5   |      | 5 |
| Clathrin light chain B                  | Cyto | C-term  | SLKQTPLSR                | Prefrontal Cortex | 3 | 2 | 1028.58 | 1028.60 | nd   |      | >3   |      | 5 |
| Cofilin, non-muscle isoform (Cofilin-1) | Cyto | N-term  | Ac-ASGVAVSDGVIKV         | Cortex            | 2 | 1 | 1242.66 | 1242.68 | nd   |      | >3   |      | 5 |
| Cofilin, non-muscle isoform (Cofilin-1) | Cyto | N-term  | Ac-ASGVAVSDGVIKV         | Hypothalamus      | 2 | 1 | 1242.68 | 1242.68 | nd   |      | >5   |      | 5 |
| Cofilin, non-muscle isoform (Cofilin-1) | Cyto | N-term  | Ac-ASGVAVSDGVIKV         | Prefrontal Cortex | 2 | 1 | 1242.65 | 1242.68 | nd   |      | >3   |      | 5 |
| Cofilin, non-muscle isoform (Cofilin-1) | Cyto | N-term  | Ac-ASGVAVSDGVIKV         | Striatum          | 2 | 1 | 1242.66 | 1242.68 | nd   |      | >5   |      | 5 |
| Cytochrome C oxidase subunit 5a         | Mito | 126-132 | RPTLNEL                  | Cortex            | 2 | 1 | 841.48  | 841.47  | nd   |      | >5   |      | 5 |
| Cytochrome C oxidase subunit 5a         | Mito | 126-132 | RPTLNEL                  | Hypothalamus      | 2 | 1 | 841.47  | 841.47  | nd   |      | >5   |      | 5 |
| Cytochrome C oxidase subunit 5a         | Mito | 126-132 | RPTLNEL                  | Striatum          | 2 | 1 | 841.45  | 841.47  | nd   |      | >5   |      | 5 |
| Cytochrome C oxidase subunit 5a         | Mito | 79-87   | VPEPKIIDA                | Amygdala          | 2 | 1 | 980.53  | 980.55  | nd   |      | >5   |      | 5 |
| Cytochrome C oxidase subunit 5a         | Mito | 79-87   | VPEPKIIDA                | Cortex            | 2 | 2 | 980.52  | 980.55  | nd   |      | >5   |      | 5 |
| Cytochrome C oxidase subunit 5a         | Mito | 79-87   | VPEPKIIDA                | Hypothalamus      | 2 | 2 | 980.54  | 980.55  | nd   |      | >5   |      | 5 |
| Cytochrome C oxidase subunit 5a         | Mito | 79-87   | VPEPKIIDA                | Striatum          | 2 | 2 | 980.57  | 980.55  | nd   |      | >5   |      | 5 |
| Cytochrome C oxidase subunit 5a         | Mito | 57-66   | NKPDIDAWEL               | Striatum          | 2 | 2 | 1199.58 | 1199.58 | nd   |      | >5   |      | 5 |
| Cytochrome C oxidase subunit 5a         | Mito | 77-87   | DLVPEPKIIDA              | Cortex            | 2 | 2 | 1208.66 | 1208.67 | nd   |      | >5   |      | 5 |
| Cytochrome C oxidase subunit 5a         | Mito | 77-87   | DLVPEPKIIDA              | Hypothalamus      | 2 | 2 | 1208.65 | 1208.67 | nd   |      | >5   |      | 5 |
| Cytochrome C oxidase subunit 5a         | Mito | 96-107  | NDFASAVRILEV             | Amygdala          | 2 | 1 | 1332.70 | 1332.70 | nd   |      | >5   |      | 5 |
| Cytochrome C oxidase subunit 5a         | Mito | 96-107  | NDFASAVRILEV             | Cortex            | 2 | 1 | 1332.70 | 1332.70 | nd   |      | >5   |      | 5 |
| Cytochrome C oxidase subunit 5a         | Mito | 96-107  | NDFASAVRILEV             | Striatum          | 2 | 1 | 1332.71 | 1332.70 | nd   |      | >5   |      | 5 |
| Cytochrome C oxidase subunit 5a         | Mito | C-term  | GISTPEELGLDKV            | Amygdala          | 2 | 2 | 1356.67 | 1356.71 | nd   |      | >5   |      | 5 |
| Cytochrome C oxidase subunit 5a         | Mito | C-term  | GISTPEELGLDKV            | Cortex            | 2 | 2 | 1356.68 | 1356.71 | nd   |      | >5   |      | 5 |

|                                 |      |        |                       |              |   |   |         |         |    |  |    |   |
|---------------------------------|------|--------|-----------------------|--------------|---|---|---------|---------|----|--|----|---|
| Cytochrome C oxidase subunit 5a | Mito | C-term | GISTPEELGLDKV         | Striatum     | 2 | 2 | 1356.66 | 1356.71 | nd |  | >5 | 5 |
| Cytochrome C oxidase subunit 5a | Mito | C-term | GISTPEELGLDKV         | Amygdala     | 2 | 2 | 1356.66 | 1356.71 | nd |  | >5 | 5 |
| Cytochrome C oxidase subunit 5a | Mito | C-term | GISTPEELGLDKV         | Amygdala     | 2 | 2 | 1356.68 | 1356.71 | nd |  | >5 | 5 |
| Cytochrome C oxidase subunit 5a | Mito | C-term | GISTPEELGLDKV         | Hypothalamus | 2 | 2 | 1356.71 | 1356.71 | nd |  | >5 | 5 |
| Cytochrome C oxidase subunit 5a | Mito | C-term | GISTPEELGLDKV         | Hypothalamus | 2 | 2 | 1356.74 | 1356.71 | nd |  | >5 | 5 |
| Cytochrome C oxidase subunit 5a | Mito | C-term | RPTLNELGISTPEELGLDKV  | Amygdala     | 3 | 1 | 2180.16 | 2180.17 | nd |  | >5 | 5 |
| Cytochrome C oxidase subunit 5a | Mito | C-term | RPTLNELGISTPEELGLDKV  | Amygdala     | 3 | 2 | 2180.15 | 2180.17 | nd |  | >5 | 5 |
| Cytochrome C oxidase subunit 5a | Mito | C-term | RPTLNELGISTPEELGLDKV  | Cortex       | 3 | 2 | 2180.22 | 2180.17 | nd |  | >5 | 5 |
| Cytochrome C oxidase subunit 5a | Mito | C-term | RPTLNELGISTPEELGLDKV  | Hypothalamus | 3 | 2 | 2180.17 | 2180.17 | nd |  | >5 | 5 |
| Cytochrome C oxidase subunit 5a | Mito | C-term | LRPTLNELGISTPEELGLDKV | Amygdala     | 3 | 1 | 2293.29 | 2293.25 | nd |  | >5 | 5 |
| Cytochrome C oxidase subunit 5a | Mito | C-term | LRPTLNELGISTPEELGLDKV | Amygdala     | 3 | 2 | 2293.25 | 2293.25 | nd |  | >5 | 5 |
| Cytochrome C oxidase subunit 6a | Mito | 49-57  | LPGVGVSMML            | Hypothalamus | 2 | 1 | 871.47  | 871.48  | nd |  | >5 | 5 |
| Cytochrome C oxidase subunit 6a | Mito | 46-57  | FVALPGVGVSMML         | Amygdala     | 2 | 1 | 1188.69 | 1188.66 | nd |  | >5 | 5 |
| Cytochrome C oxidase subunit 6a | Mito | 98-111 | NPHVNPLPTGYEDE        | Striatum     | 2 | 1 | 1580.73 | 1580.71 | nd |  | >5 | 5 |
| Cytochrome C oxidase subunit 6a | Mito | 96-111 | FHNPHVNPLPTGYEDE      | Hypothalamus | 3 | 1 | 1864.84 | 1864.83 | nd |  | >5 | 5 |
| Cytochrome C oxidase subunit 6a | Mito | 96-111 | FHNPHVNPLPTGYEDE      | Striatum     | 3 | 1 | 1864.86 | 1864.83 | nd |  | >5 | 5 |
| Cytochrome C oxidase subunit 6b | Mito | N-term | Ac-AEDIKTKI           | Hypothalamus | 2 | 2 | 958.52  | 958.53  | nd |  | >5 | 5 |
| Cytochrome C oxidase subunit 6b | Mito | N-term | Ac-AEDIKTKIKNY        | Amygdala     | 3 | 3 | 1363.64 | 1363.73 | nd |  | >5 | 5 |
| Cytochrome C oxidase subunit 6b | Mito | N-term | Ac-AEDIKTKIKNY        | Hypothalamus | 3 | 3 | 1363.69 | 1363.73 | nd |  | >5 | 5 |
| Cytochrome C oxidase subunit 6b | Mito | N-term | Ac-AEDIKTKIKNY        | Hypothalamus | 3 | 3 | 1363.74 | 1363.73 | nd |  | >5 | 5 |
| Cytochrome C oxidase subunit 6b | Mito | 13-17  | KTAPFDSRFPNQNT        | Amygdala     | 3 | 2 | 1749.84 | 1749.84 | nd |  | >5 | 5 |
| Cytochrome C oxidase subunit 6b | Mito | 13-17  | KTAPFDSRFPNQNT        | Hypothalamus | 3 | 2 | 1749.84 | 1749.84 | nd |  | >5 | 5 |
| Cytochrome C oxidase subunit 6b | Mito | 13-17  | KTAPFDSRFPNQNT        | Hypothalamus | 3 | 2 | 1749.84 | 1749.84 | nd |  | >5 | 5 |
| Cytochrome c oxidase subunit 6b | Mito | N-term | Ac-AEDIKTKI           | Cortex       | 2 | 2 | 958.50  | 958.53  | nd |  | >3 | 5 |
| Cytochrome c oxidase subunit 6b | Mito | N-term | (Ac-AEDIKTKIK)        | Hypothalamus | 3 | 3 | 1086.63 | 1086.63 | nd |  | >5 | 5 |
| Cytochrome c oxidase subunit 6b | Mito | N-term | Ac-AEDIKTKIKNY        | Amygdala     | 3 | 3 | 1363.64 | 1363.73 | nd |  | >3 | 5 |

|                                 |      |        |                     |                   |   |   |         |         |    |    |   |
|---------------------------------|------|--------|---------------------|-------------------|---|---|---------|---------|----|----|---|
| Cytochrome c oxidase subunit 6b | Mito | N-term | Ac-AEDIKTKIKNY      | Amygdala          | 3 | 3 | 1363.68 | 1363.73 | nd | >5 | 5 |
| Cytochrome c oxidase subunit 6b | Mito | N-term | Ac-AEDIKTKIKNY      | Cortex            | 3 | 3 | 1363.69 | 1363.73 | nd | >5 | 5 |
| Cytochrome c oxidase subunit 6b | Mito | N-term | Ac-AEDIKTKIKNY      | Hypothalamus      | 3 | 3 | 1363.64 | 1363.73 | nd | >5 | 5 |
| Cytochrome c oxidase subunit 6b | Mito | N-term | Ac-AEDIKTKIKNY      | Prefrontal Cortex | 3 | 3 | 1363.72 | 1363.73 | nd | >5 | 5 |
| Cytochrome c oxidase subunit 6b | Mito | N-term | Ac-AEDIKTKIKNY      | Striatum          | 3 | 3 | 1363.69 | 1363.73 | nd | >5 | 5 |
| Cytochrome c oxidase subunit 6b | Mito | C-term | DDRIAEGTFPGKI       | Amygdala          | 3 | 1 | 1417.65 | 1417.72 | nd | >5 | 5 |
| Cytochrome c oxidase subunit 6b | Mito | C-term | DDRIAEGTFPGKI       | Amygdala          | 3 | 2 | 1417.64 | 1417.72 | nd | >3 | 5 |
| Cytochrome c oxidase subunit 6b | Mito | C-term | DDRIAEGTFPGKI       | Amygdala          | 3 | 2 | 1417.70 | 1417.72 | nd | >5 | 5 |
| Cytochrome c oxidase subunit 6b | Mito | C-term | DDRIAEGTFPGKI       | Cortex            | 3 | 2 | 1417.75 | 1417.72 | nd | >5 | 5 |
| Cytochrome c oxidase subunit 6b | Mito | C-term | DDRIAEGTFPGKI       | Hypothalamus      | 3 | 1 | 1417.72 | 1417.72 | nd | >5 | 5 |
| Cytochrome c oxidase subunit 6b | Mito | C-term | DDRIAEGTFPGKI       | Hypothalamus      | 3 | 2 | 1417.72 | 1417.72 | nd | >5 | 5 |
| Cytochrome c oxidase subunit 6b | Mito | C-term | DDRIAEGTFPGKI       | Hypothalamus      | 3 | 2 | 1417.72 | 1417.72 | nd | >5 | 5 |
| Cytochrome c oxidase subunit 6b | Mito | C-term | DDRIAEGTFPGKI       | Prefrontal Cortex | 3 | 2 | 1417.72 | 1417.72 | nd | >3 | 5 |
| Cytochrome c oxidase subunit 6b | Mito | C-term | DDRIAEGTFPGKI       | Striatum          | 3 | 2 | 1417.69 | 1417.72 | nd | >5 | 5 |
| Cytochrome c oxidase subunit 6b | Mito | N-term | Ac-AEDIKTKIKNYKT    | Amygdala          | 4 | 4 | 1592.76 | 1592.88 | nd | >5 | 5 |
| Cytochrome c oxidase subunit 6b | Mito | N-term | Ac-AEDIKTKIKNYKT    | Amygdala          | 4 | 4 | 1592.76 | 1592.88 | nd | >5 | 5 |
| Cytochrome c oxidase subunit 6b | Mito | N-term | Ac-AEDIKTKIKNYKT    | Cortex            | 4 | 4 | 1592.85 | 1592.88 | nd | >5 | 5 |
| Cytochrome c oxidase subunit 6b | Mito | N-term | Ac-AEDIKTKIKNYKT    | Hypothalamus      | 3 | 4 | 1592.86 | 1592.88 | nd | >5 | 5 |
| Cytochrome c oxidase subunit 6b | Mito | N-term | Ac-AEDIKTKIKNYKT    | Hypothalamus      | 4 | 4 | 1592.84 | 1592.88 | nd | >5 | 5 |
| Cytochrome c oxidase subunit 6b | Mito | N-term | Ac-AEDIKTKIKNYKT    | Hypothalamus      | 4 | 4 | 1592.85 | 1592.88 | nd | >5 | 5 |
| Cytochrome c oxidase subunit 6b | Mito | N-term | (Ac-AEDIKTKIKNYKTA) | Amygdala          | 4 | 4 | 1663.87 | 1663.91 | nd | >5 | 5 |
| Cytochrome c oxidase subunit 6b | Mito | C-term | AWDDRIAEGTFPGKI     | Hypothalamus      | 3 | 2 | 1674.83 | 1674.84 | nd | >5 | 5 |
| Cytochrome c oxidase subunit 6b | Mito | C-term | AWDDRIAEGTFPGKI     | Amygdala          | 3 | 1 | 1674.79 | 1674.84 | nd | >5 | 5 |
| Cytochrome c oxidase subunit 6b | Mito | C-term | AWDDRIAEGTFPGKI     | Amygdala          | 3 | 2 | 1674.84 | 1674.84 | nd | >5 | 5 |
| Cytochrome c oxidase subunit 6b | Mito | C-term | AWDDRIAEGTFPGKI     | Amygdala          | 3 | 2 | 1674.85 | 1674.84 | nd | >5 | 5 |
| Cytochrome c oxidase subunit 6b | Mito | C-term | AWDDRIAEGTFPGKI     | Hypothalamus      | 3 | 1 | 1674.82 | 1674.84 | nd | >5 | 5 |

|                                                       |      |        |                      |                   |   |   |         |         |      |      |      |      |   |
|-------------------------------------------------------|------|--------|----------------------|-------------------|---|---|---------|---------|------|------|------|------|---|
| Cytochrome c oxidase subunit 6b                       | Mito | C-term | AWDDRIAEGTFPGKI      | Striatum          | 3 | 2 | 1674.86 | 1674.84 | nd   |      | >5   |      | 5 |
| Cytochrome c oxidase subunit 6b                       | Mito | 13-27  | KTAPFDSRFPNQNQT      | Cortex            | 3 | 2 | 1749.90 | 1749.84 | nd   |      | >5   |      | 5 |
| Cytochrome c oxidase subunit 6b                       | Mito | 13-27  | KTAPFDSRFPNQNQT      | Prefrontal Cortex | 3 | 2 | 1749.83 | 1749.84 | nd   |      | >3   |      | 5 |
| Cytochrome c oxidase subunit 6b                       | Mito | 13-27  | KTAPFDSRFPNQNQT      | Striatum          | 3 | 2 | 1749.84 | 1749.84 | nd   |      | >5   |      | 5 |
| Cytochrome c oxidase subunit 6b                       | Mito | C-term | VSAWDDRIAEGTFPGKI    | Amygdala          | 3 | 1 | 1860.94 | 1860.93 | nd   |      | >5   |      | 5 |
| Cytochrome c oxidase subunit 6b                       | Mito | C-term | VSAWDDRIAEGTFPGKI    | Hypothalamus      | 3 | 1 | 1860.95 | 1860.93 | nd   |      | >5   |      | 5 |
| Cytochrome C oxidase subunit 7b                       | Mito | N-term | SHQKRAPSFHDKYGNAILA  | Amygdala          | 4 | 2 | 2139.06 | 2139.11 | 1.11 | 0.55 | 3.86 | 2.57 | 5 |
| Cytochrome C oxidase subunit 7b                       | Mito | N-term | SHQKRAPSFHDKYGNAILA  | Amygdala          | 5 | 2 | 2139.12 | 2139.11 | 1.45 | 1.40 | 1.50 | 0.71 | 4 |
| Cytochrome C oxidase subunit 7b                       | Mito | N-term | SHQKRAPSFHDKYGNAILA  | Hypothalamus      | 4 | 2 | 2139.13 | 2139.11 | 1.00 | 0.11 | 2.05 | 0.95 | 4 |
| Cytochrome C oxidase subunit 7b                       | Mito | N-term | SHQKRAPSFHDKYGNAILA  | Hypothalamus      | 5 | 2 | 2139.12 | 2139.11 | 1.01 | 0.12 | 0.53 | 0.53 | 2 |
| Diazepam binding inhibitor (Acyl-CoA-binding protein) | Cyto | C-term | VEKVDELKKKYGI        | Amygdala          | 4 | 4 | 1547.82 | 1547.89 | nd   |      | >5   |      | 5 |
| Diazepam binding inhibitor (Acyl-CoA-binding protein) | Cyto | 36-50  | TVGDVNTDRPGLLDL      | Amygdala          | 2 | 1 | 1583.83 | 1583.82 | nd   |      | >5   |      | 5 |
| Diazepam binding inhibitor (Acyl-CoA-binding protein) | Cyto | 36-50  | TVGDVNTDRPGLLDL      | Hypothalamus      | 2 | 1 | 1583.82 | 1583.82 | nd   |      | >5   |      | 5 |
| Diazepam binding inhibitor (Acyl-CoA-binding protein) | Cyto | 36-50  | TVGDVNTDRPGLLDL      | Hypothalamus      | 2 | 1 | 1583.85 | 1583.82 | nd   |      | >5   |      | 5 |
| Diazepam binding inhibitor (Acyl-CoA-binding protein) | Cyto | N-term | Ac-SQAEFDKAAEEVKRLK  | Amygdala          | 4 | 3 | 1889.93 | 1889.98 | nd   |      | >5   |      | 5 |
| Diazepam binding inhibitor (Acyl-CoA-binding protein) | Cyto | N-term | Ac-SQAEFDKAAEEVKRLK  | Hypothalamus      | 4 | 3 | 1889.98 | 1889.98 | nd   |      | >5   |      | 5 |
| Diazepam binding inhibitor (Acyl-CoA-binding protein) | Cyto | N-term | Ac-SQAEFDKAAEEVKRLK  | Hypothalamus      | 4 | 3 | 1889.98 | 1889.98 | nd   |      | >5   |      | 5 |
| Diazepam binding inhibitor (Acyl-CoA-binding protein) | Cyto | 33-50  | KQATVGDVNTDRPGLLDL   | Amygdala          | 3 | 1 | 1910.96 | 1911.01 | nd   |      | >5   |      | 5 |
| Diazepam binding inhibitor (Acyl-CoA-binding protein) | Cyto | 33-50  | KQATVGDVNTDRPGLLDL   | Amygdala          | 3 | 2 | 1910.97 | 1911.01 | nd   |      | >5   |      | 5 |
| Diazepam binding inhibitor (Acyl-CoA-binding protein) | Cyto | 33-50  | KQATVGDVNTDRPGLLDL   | Hypothalamus      | 3 | 1 | 1911.03 | 1911.01 | nd   |      | >5   |      | 5 |
| Diazepam binding inhibitor (Acyl-CoA-binding protein) | Cyto | 33-50  | KQATVGDVNTDRPGLLDL   | Hypothalamus      | 3 | 2 | 1911.01 | 1911.01 | nd   |      | >5   |      | 5 |
| Diazepam binding inhibitor (Acyl-CoA-binding protein) | Cyto | 33-50  | KQATVGDVNTDRPGLLDL   | Hypothalamus      | 3 | 2 | 1911.03 | 1911.01 | nd   |      | >5   |      | 5 |
| Diazepam binding inhibitor (Acyl-CoA-binding protein) | Cyto | 58-74  | AEEVKRLKTQPTDEEML    | Hypothalamus      | 3 | 3 | 2016.02 | 2016.02 | nd   |      | >5   |      | 5 |
| Diazepam binding inhibitor (Acyl-CoA-binding protein) | Cyto | 58-74  | AEEVKRLKTQPTDEEML    | Hypothalamus      | 4 | 3 | 2016.02 | 2016.02 | nd   |      | >5   |      | 5 |
| Diazepam binding inhibitor (Acyl-CoA-binding protein) | Cyto | 58-77  | AEEVKRLKTQPTDEEMLFIY | Amygdala          | 4 | 2 | 2439.20 | 2439.24 | nd   |      | >5   |      | 5 |
| Diazepam binding inhibitor (Acyl-CoA-binding protein) | Cyto | 58-77  | AEEVKRLKTQPTDEEMLFIY | Hypothalamus      | 3 | 3 | 2439.23 | 2439.24 | nd   |      | >5   |      | 5 |



|                                                                         |      |         |                                    |              |   |   |         |         |    |  |    |   |
|-------------------------------------------------------------------------|------|---------|------------------------------------|--------------|---|---|---------|---------|----|--|----|---|
| Diazepam binding inhibitor (Acyl-CoA-binding protein)                   | Cyto | 58-77   | AEEVKRLKTQPTDEEMLFYI               | Hypothalamus | 4 | 2 | 2439.21 | 2439.24 | nd |  | >5 | 5 |
| Diazepam binding inhibitor (Acyl-CoA-binding protein)                   | Cyto | 58-77   | AEEVKRLKTQPTDEEMLFYI               | Hypothalamus | 4 | 3 | 2439.23 | 2439.24 | nd |  | >5 | 5 |
| Diazepam binding inhibitor (Acyl-CoA-binding protein)                   | Cyto | N-term  | Ac-SQAEFDKAAEEVKRLKTQPTDEEML       | Amygdala     | 4 | 3 | 2934.26 | 2934.43 | nd |  | >5 | 5 |
| Diazepam binding inhibitor (Acyl-CoA-binding protein)                   | Cyto | N-term  | Ac-SQAEFDKAAEEVKRLKTQPTDEEML       | Hypothalamus | 4 | 3 | 2934.43 | 2934.43 | nd |  | >5 | 5 |
| Diazepam binding inhibitor (Acyl-CoA-binding protein)                   | Cyto | N-term  | Ac-SQAEFDKAAEEVKRLKTQPTDEEML       | Hypothalamus | 4 | 3 | 2934.52 | 2934.43 | nd |  | >5 | 5 |
| Diazepam binding inhibitor (Acyl-CoA-binding protein)                   | Cyto | N-term  | Ac-SQAEFDKAAEEVKRLKTQPTDEEMLFI     | Amygdala     | 4 | 3 | 3194.63 | 3194.58 | nd |  | >5 | 5 |
| Diazepam binding inhibitor (Acyl-CoA-binding protein)                   | Cyto | N-term  | Ac-SQAEFDKAAEEVKRLKTQPTDEEMLFI     | Hypothalamus | 4 | 3 | 3194.53 | 3194.58 | nd |  | >5 | 5 |
| Diazepam binding inhibitor (Acyl-CoA-binding protein)                   | Cyto | N-term  | Ac-SQAEFDKAAEEVKRLKTQPTDEEMLFYI    | Amygdala     | 4 | 3 | 3357.58 | 3357.64 | nd |  | >5 | 5 |
| Diazepam binding inhibitor (Acyl-CoA-binding protein)                   | Cyto | N-term  | Ac-SQAEFDKAAEEVKRLKTQPTDEEMLFYI    | Amygdala     | 4 | 3 | 3357.63 | 3357.64 | nd |  | >5 | 5 |
| Diazepam binding inhibitor (Acyl-CoA-binding protein)                   | Cyto | N-term  | Ac-SQAEFDKAAEEVKRLKTQPTDEEMLFYI    | Hypothalamus | 4 | 3 | 3357.70 | 3357.64 | nd |  | >5 | 5 |
| Diazepam binding inhibitor (Acyl-CoA-binding protein)                   | Cyto | N-term  | Ac-SQAEFDKAAEEVKRLKTQPTDEEMLFYI    | Hypothalamus | 4 | 3 | 3357.63 | 3357.64 | nd |  | >5 | 5 |
| Diazepam binding inhibitor (Acyl-CoA-binding protein)                   | Cyto | N-term  | Ac-SQAEFDKAAEEVKRLKTQPTDEEMLFIYS   | Amygdala     | 4 | 3 | 3444.78 | 3444.68 | nd |  | >5 | 5 |
| Diazepam binding inhibitor (Acyl-CoA-binding protein)                   | Cyto | N-term  | Ac-SQAEFDKAAEEVKRLKTQPTDEEMLFIYS   | Hypothalamus | 4 | 3 | 3444.70 | 3444.68 | nd |  | >5 | 5 |
| Diazepam binding inhibitor (Acyl-CoA-binding protein)                   | Cyto | N-term  | Ac-SQAEFDKAAEEVKRLKTQPTDEEMLFIYSHF | Amygdala     | 4 | 3 | 3728.81 | 3728.79 | nd |  | >5 | 5 |
| Diazepam binding inhibitor (Acyl-CoA-binding protein)                   | Cyto | N-term  | Ac-SQAEFDKAAEEVKRLKTQPTDEEMLFIYSHF | Amygdala     | 5 | 3 | 3728.74 | 3728.79 | nd |  | >5 | 5 |
| Diazepam binding inhibitor (Acyl-CoA-binding protein)                   | Cyto | N-term  | Ac-SQAEFDKAAEEVKRLKTQPTDEEMLFIYSHF | Amygdala     | 5 | 3 | 3728.80 | 3728.79 | nd |  | >5 | 5 |
| Diazepam binding inhibitor (Acyl-CoA-binding protein)                   | Cyto | N-term  | Ac-SQAEFDKAAEEVKRLKTQPTDEEMLFIYSHF | Hypothalamus | 5 | 3 | 3728.77 | 3728.79 | nd |  | >5 | 5 |
| Excitatory amino acid transporter 1 (Solute carrier family 1, member 3) | Memb | 174-182 | IRNMFPPNL                          | Striatum     | 2 | 1 | 1100.58 | 1100.58 | nd |  | >5 | 5 |
| Excitatory amino acid transporter 1 (Solute carrier family 1, member 3) | Memb | 174-184 | IRNMFPPNLVE                        | Hypothalamus | 2 | 1 | 1328.70 | 1328.69 | nd |  | >5 | 5 |
| FK506-binding protein 1A (FKBP12)                                       | Cyto | C-term  | VFDVELLKLE                         | Cortex       | 2 | 2 | 1203.70 | 1203.68 | nd |  | >5 | 5 |
| FK506-binding protein 1A (FKBP12)                                       | Cyto | N-term  | GVQVETISPGDGRTFPKRGQT              | Amygdala     | 4 | 2 | 2229.18 | 2229.15 | nd |  | >3 | 5 |
| Heat shock protein 1 (chaperonin 10)                                    | Mito | N-term  | Ac-AGQAFRKFLLPL                    | Amygdala     | 2 | 1 | 1288.74 | 1288.73 | nd |  | >5 | 5 |
| Heat shock protein 1 (chaperonin 10)                                    | Mito | N-term  | Ac-AGQAFRKFLLPLFDRV                | Amygdala     | 3 | 1 | 1805.99 | 1805.98 | nd |  | >5 | 5 |
| Heat shock protein 1 (chaperonin 10)                                    | Mito | N-term  | Ac-AGQAFRKFLLPLFDRV                | Amygdala     | 3 | 1 | 1805.99 | 1805.98 | nd |  | >5 | 5 |
| Heat shock protein 1 (chaperonin 10)                                    | Mito | N-term  | Ac-AGQAFRKFLLPLFDRV                | Amygdala     | 3 | 1 | 1806.00 | 1805.98 | nd |  | >5 | 5 |



|                                        |      |        |                         |                   |   |   |         |         |      |      |      |      |   |
|----------------------------------------|------|--------|-------------------------|-------------------|---|---|---------|---------|------|------|------|------|---|
| Heat shock protein 1 (chaperonin 10)   | Mito | N-term | Ac-AGQAFRKFLPLFDRV      | Hypothalamus      | 3 | 1 | 1805.97 | 1805.98 | nd   |      | >5   |      | 5 |
| Heat shock protein 1 (chaperonin 10)   | Mito | N-term | Ac-AGQAFRKFLPLFDRVLVER  | Amygdala          | 4 | 1 | 2303.32 | 2303.29 | nd   |      | >5   |      | 5 |
| Heat shock protein 1 (chaperonin 10)   | Mito | N-term | Ac-AGQAFRKFLPLFDRVLVER  | Amygdala          | 4 | 1 | 2303.33 | 2303.29 | nd   |      | >5   |      | 5 |
| Heat shock protein 1 (chaperonin 10)   | Mito | N-term | Ac-AGQAFRKFLPLFDRVLVERS | Amygdala          | 4 | 1 | 2390.29 | 2390.32 | nd   |      | >5   |      | 5 |
| Heat shock protein 1 (chaperonin 10)   | Mito | N-term | Ac-AGQAFRKFLPLFDRVLVERS | Amygdala          | 4 | 1 | 2390.38 | 2390.32 | nd   |      | >5   |      | 5 |
| Heat shock protein 1 (chaperonin 10)   | Mito | N-term | Ac-AGQAFRKFLPLFDRVLVERS | Hypothalamus      | 4 | 1 | 2390.28 | 2390.32 | nd   |      | >5   |      | 5 |
| Hemoglobin alpha                       | Cyto | C-term | STVLTSKYR               | Striatum          | 3 | 2 | 1053.60 | 1053.58 | nd   |      | >5   |      | 5 |
| Hemoglobin alpha                       | Cyto | N-term | VLSGEDKSNIKA            | Striatum          | 3 | 3 | 1259.64 | 1259.67 | nd   |      | >5   |      | 5 |
| Hemoglobin alpha                       | Cyto | C-term | ASVSTVLTSKYR            | Amygdala          | 3 | 2 | 1310.71 | 1310.72 | nd   |      | >5   |      | 5 |
| Hemoglobin alpha                       | Cyto | 2-14   | VLSGEDKSNIKAA           | Hypothalamus      | 3 | 3 | 1330.69 | 1330.71 | 1.14 | 0.70 | >10  |      | 5 |
| Hemoglobin alpha                       | Cyto | 2-14   | VLSGEDKSNIKAA           | Amygdala          | 3 | 2 | 1330.66 | 1330.71 | 1.00 | 0.01 | 7.50 | 6.50 | 5 |
| Hemoglobin alpha                       | Cyto | 2-14   | VLSGEDKSNIKAA           | Hypothalamus      | 3 | 2 | 1330.70 | 1330.71 | 2.40 | 3.02 | 3.58 | 3.35 | 5 |
| Hemoglobin beta                        | Cyto | 6-17   | DAEKAAVSGLWG            | Striatum          | 2 | 2 | 1202.54 | 1202.59 | 1.03 | 0.31 | 2.45 | 0.18 | 4 |
| Hemoglobin beta                        | Cyto | N-term | VHLTDAEKAAVS            | Hypothalamus      | 2 | 2 | 1239.64 | 1239.65 | 1.32 | 1.15 | 2.33 | 0.03 | 4 |
| Hemoglobin beta                        | Cyto | N-term | VHLTDAEKAAVS            | Hypothalamus      | 3 | 2 | 1239.60 | 1239.65 | nd   |      | >10  |      | 5 |
| Hemoglobin beta                        | Cyto | N-term | VHLTDAEKAAVS            | Hypothalamus      | 3 | 2 | 1239.65 | 1239.65 | 1.57 | 1.64 | 2.55 | 0.27 | 4 |
| Macrophage migration inhibitory factor | Cyto | 11-27  | PRASVPEGFLSELTQQL       | Cortex            | 2 | 1 | 1870.96 | 1870.98 | nd   |      | >5   |      | 5 |
| Macrophage migration inhibitory factor | Cyto | 28-47  | AQATGKPAQYIAVHVVPDQL    | Amygdala          | 2 | 1 | 2105.17 | 2105.13 | nd   |      | >5   |      | 5 |
| Macrophage migration inhibitory factor | Cyto | 28-47  | AQATGKPAQYIAVHVVPDQL    | Amygdala          | 3 | 1 | 2105.11 | 2105.13 | nd   |      | >5   |      | 5 |
| Macrophage migration inhibitory factor | Cyto | 28-47  | AQATGKPAQYIAVHVVPDQL    | Amygdala          | 3 | 2 | 2105.02 | 2105.13 | nd   |      | >3   |      | 5 |
| Macrophage migration inhibitory factor | Cyto | 28-47  | AQATGKPAQYIAVHVVPDQL    | Amygdala          | 3 | 2 | 2105.11 | 2105.13 | nd   |      | >3   |      | 5 |
| Macrophage migration inhibitory factor | Cyto | 28-47  | AQATGKPAQYIAVHVVPDQL    | Amygdala          | 3 | 2 | 2105.12 | 2105.13 | nd   |      | >5   |      | 5 |
| Macrophage migration inhibitory factor | Cyto | 28-47  | AQATGKPAQYIAVHVVPDQL    | Cortex            | 3 | 2 | 2105.12 | 2105.13 | nd   |      | >5   |      | 5 |
| Macrophage migration inhibitory factor | Cyto | 28-47  | AQATGKPAQYIAVHVVPDQL    | Hypothalamus      | 3 | 1 | 2105.15 | 2105.13 | 1.06 | 0.39 | >10  | 6.60 | 5 |
| Macrophage migration inhibitory factor | Cyto | 28-47  | AQATGKPAQYIAVHVVPDQL    | Hypothalamus      | 3 | 2 | 2105.13 | 2105.13 | nd   |      | >5   |      | 5 |
| Macrophage migration inhibitory factor | Cyto | 28-47  | AQATGKPAQYIAVHVVPDQL    | Hypothalamus      | 3 | 2 | 2105.17 | 2105.13 | nd   |      | >5   |      | 5 |
| Macrophage migration inhibitory factor | Cyto | 28-47  | AQATGKPAQYIAVHVVPDQL    | Prefrontal Cortex | 3 | 2 | 2105.05 | 2105.13 | nd   |      | >5   |      | 5 |
| Macrophage migration inhibitory factor | Cyto | 28-47  | AQATGKPAQYIAVHVVPDQL    | Striatum          | 3 | 2 | 2105.10 | 2105.13 | nd   |      | >5   |      | 5 |

|                                        |      |        |                            |              |   |   |         |         |      |      |      |      |   |
|----------------------------------------|------|--------|----------------------------|--------------|---|---|---------|---------|------|------|------|------|---|
| Macrophage migration inhibitory factor | Cyto | N-term | PMFIVNTNVPRASVPEGFLSEL     | Amygdala     | 3 | 1 | 2416.29 | 2416.25 | nd   |      | >5   |      | 5 |
| Macrophage migration inhibitory factor | Cyto | 28-50  | AQATGKPAQYIAVHVVPDQLMTF    | Amygdala     | 3 | 1 | 2484.31 | 2484.28 | nd   |      | >5   |      | 5 |
| Macrophage migration inhibitory factor | Cyto | 28-50  | AQATGKPAQYIAVHVVPDQLMTF    | Hypothalamus | 3 | 1 | 2484.25 | 2484.28 | 1.00 | 0.09 | 2.82 | 0.54 | 4 |
| Macrophage migration inhibitory factor | Cyto | N-term | PMFIVNTNVPRASVPEGFLSELTQQL | Amygdala     | 3 | 1 | 2886.50 | 2886.50 | nd   |      | >3   |      | 5 |
| Macrophage migration inhibitory factor | Cyto | N-term | PMFIVNTNVPRASVPEGFLSELTQQL | Amygdala     | 3 | 1 | 2886.50 | 2886.50 | nd   |      | >5   |      | 5 |
| Macrophage migration inhibitory factor | Cyto | N-term | PMFIVNTNVPRASVPEGFLSELTQQL | Amygdala     | 3 | 1 | 2886.56 | 2886.50 | nd   |      | >5   |      | 5 |
| Macrophage migration inhibitory factor | Cyto | N-term | PMFIVNTNVPRASVPEGFLSELTQQL | Amygdala     | 4 | 1 | 2886.56 | 2886.50 | nd   |      | >5   |      | 5 |
| Microtubule-associated protein tau     | Cyto | C-term | ADEVASLAKQGL               | Hypothalamus | 2 | 2 | 1287.67 | 1287.67 | nd   |      | >5   |      | 5 |
| Myelin basic protein                   | Cyto | N-term | Ac-ASQKRPSQRSKYL           | Amygdala     | 3 | 2 | 1589.87 | 1589.86 | nd   |      | >5   |      | 5 |
| Myelin basic protein                   | Cyto | N-term | Ac-ASQKRPSQRSKYL           | Amygdala     | 4 | 2 | 1589.82 | 1589.86 | nd   |      | >5   |      | 5 |
| Myelin basic protein                   | Cyto | N-term | Ac-ASQKRPSQRSKYL           | Cortex       | 3 | 2 | 1589.90 | 1589.86 | nd   |      | >5   |      | 5 |
| Myelin basic protein                   | Cyto | N-term | Ac-ASQKRPSQRSKYL           | Cortex       | 4 | 2 | 1589.85 | 1589.86 | nd   |      | >5   |      | 5 |
| Myelin basic protein                   | Cyto | N-term | Ac-ASQKRPSQRSKYLA          | Amygdala     | 3 | 2 | 1660.91 | 1660.91 | nd   |      | >5   |      | 5 |
| Myelin basic protein                   | Cyto | N-term | Ac-ASQKRPSQRSKYLA          | Amygdala     | 4 | 2 | 1660.87 | 1660.91 | nd   |      | >5   |      | 5 |
| Myelin basic protein                   | Cyto | N-term | Ac-ASQKRPSQRSKYLA          | Amygdala     | 4 | 2 | 1660.89 | 1660.91 | 1.00 | 0.06 | 2.35 | 0.16 | 4 |
| Myelin basic protein                   | Cyto | N-term | Ac-ASQKRPSQRSKYLA          | Cortex       | 4 | 2 | 1660.88 | 1660.91 | 1.05 | 0.39 | 0.18 | 0.11 | 1 |
| Myelin basic protein                   | Cyto | N-term | Ac-ASQKRPSQRSKYLA          | Hypothalamus | 4 | 2 | 1660.92 | 1660.91 | 1.00 | 0.01 | 1.10 | 0.03 | 3 |
| Myelin basic protein                   | Cyto | N-term | Ac-ASQKRPSQRSKYLAT         | Amygdala     | 3 | 2 | 1761.94 | 1761.96 | nd   |      | >5   |      | 5 |
| Myelin basic protein                   | Cyto | N-term | Ac-ASQKRPSQRSKYLAT         | Amygdala     | 4 | 2 | 1761.88 | 1761.96 | nd   |      | >10  |      | 5 |
| Myelin basic protein                   | Cyto | N-term | Ac-ASQKRPSQRSKYLAT         | Amygdala     | 4 | 2 | 1762.01 | 1761.96 | nd   |      | >5   |      | 5 |
| Myelin basic protein                   | Cyto | N-term | Ac-ASQKRPSQRSKYLAT         | Cortex       | 3 | 1 | 1761.87 | 1761.96 | nd   |      | >5   |      | 5 |
| Myelin basic protein                   | Cyto | N-term | Ac-ASQKRPSQRSKYLAT         | Cortex       | 3 | 2 | 1761.99 | 1761.96 | 1.07 | 0.44 | 0.81 | 0.42 | 3 |
| Myelin basic protein                   | Cyto | N-term | Ac-ASQKRPSQRSKYLAT         | Cortex       | 4 | 1 | 1761.85 | 1761.96 | nd   |      | >5   |      | 5 |
| Myelin basic protein                   | Cyto | N-term | Ac-ASQKRPSQRSKYLAT         | Cortex       | 4 | 2 | 1761.91 | 1761.96 | 1.26 | 0.94 | 1.00 | 0.21 | 3 |
| Myelin basic protein                   | Cyto | N-term | Ac-ASQKRPSQRSKYLAT         | Cortex       | 5 | 1 | 1761.84 | 1761.96 | nd   |      | >5   |      | 5 |
| Myelin basic protein                   | Cyto | N-term | Ac-ASQKRPSQRSKYLAT         | Hypothalamus | 4 | 2 | 1761.96 | 1761.96 | 1.03 | 0.31 | 3.12 | 0.81 | 5 |
| Myelin basic protein                   | Cyto | N-term | Ac-ASQKRPSQRSKYLATA        | Amygdala     | 4 | 2 | 1832.95 | 1833.00 | 1.38 | 1.28 | 3.17 | 0.40 | 5 |
| Myelin basic protein                   | Cyto | N-term | Ac-ASQKRPSQRSKYLATA        | Amygdala     | 4 | 2 | 1832.98 | 1833.00 | 1.01 | 0.18 | 2.07 | 0.07 | 4 |
| Myelin basic protein                   | Cyto | N-term | Ac-ASQKRPSQRSKYLATA        | Amygdala     | 4 | 2 | 1833.00 | 1833.00 | 1.03 | 0.28 | 4.17 | 0.39 | 5 |
| Myelin basic protein                   | Cyto | N-term | Ac-ASQKRPSQRSKYLATA        | Cortex       | 2 | 2 | 1833.06 | 1833.00 | 1.25 | 0.94 | 0.38 | 0.00 | 2 |

|                                         |      |        |                         |                   |   |   |         |         |             |      |             |      |   |
|-----------------------------------------|------|--------|-------------------------|-------------------|---|---|---------|---------|-------------|------|-------------|------|---|
| Myelin basic protein                    | Cyto | N-term | Ac-ASQKRPSQRSKYLATA     | Cortex            | 3 | 2 | 1832.98 | 1833.00 | <b>1.16</b> | 0.69 | <b>0.41</b> | 0.14 | 2 |
| Myelin basic protein                    | Cyto | N-term | Ac-ASQKRPSQRSKYLATA     | Cortex            | 4 | 2 | 1832.94 | 1833.00 | <b>1.15</b> | 0.68 | <b>1.00</b> | 0.09 | 3 |
| Myelin basic protein                    | Cyto | N-term | Ac-ASQKRPSQRSKYLATA     | Hypothalamus      | 3 | 2 | 1833.03 | 1833.00 | <b>1.03</b> | 0.28 | <b>1.39</b> | 0.39 | 3 |
| Myelin basic protein                    | Cyto | N-term | Ac-ASQKRPSQRSKYLATA     | Hypothalamus      | 4 | 2 | 1832.99 | 1833.00 | <b>1.12</b> | 0.57 | <b>1.46</b> | 0.49 | 3 |
| Myelin basic protein                    | Cyto | N-term | Ac-ASQKRPSQRSKYLATA     | Hypothalamus      | 4 | 2 | 1833.00 | 1833.00 | <b>1.01</b> | 0.14 | <b>1.56</b> | 0.44 | 4 |
| Myelin basic protein                    | Cyto | N-term | Ac-ASQKRPSQRSKYLATA     | Hypothalamus      | 4 | 2 | 1833.00 | 1833.00 | <b>1.00</b> | 0.01 | <b>1.61</b> | 0.54 | 4 |
| Myelin basic protein                    | Cyto | N-term | Ac-ASQKRPSQRSKYLATA     | Prefrontal Cortex | 4 | 2 | 1833.00 | 1833.00 | nd          |      | >5          |      | 5 |
| Myelin basic protein                    | Cyto | N-term | Ac-ASQKRPSQRSKYLATA     | Striatum          | 4 | 2 | 1832.98 | 1833.00 | nd          |      | >5          |      | 5 |
| Myelin basic protein                    | Cyto | N-term | Ac-ASQKRPSQRSKYLATAS    | Amygdala          | 4 | 2 | 1920.03 | 1920.03 | nd          |      | >5          |      | 5 |
| Myelin basic protein                    | Cyto | N-term | Ac-ASQKRPSQRSKYLATAS    | Cortex            | 3 | 2 | 1920.07 | 1920.03 | nd          |      | >5          |      | 5 |
| Myelin basic protein                    | Cyto | N-term | Ac-ASQKRPSQRSKYLATAS    | Cortex            | 4 | 2 | 1919.99 | 1920.03 | nd          |      | >5          |      | 5 |
| Myelin basic protein                    | Cyto | N-term | Ac-ASQKRPSQRSKYLATAS    | Hypothalamus      | 4 | 2 | 1920.06 | 1920.03 | <b>1.01</b> | 0.13 | <b>0.93</b> | 0.22 | 3 |
| Myelin basic protein                    | Cyto | N-term | (Ac-ASQKRPSQRSKYLATAST) | Amygdala          | 4 | 2 | 2021.08 | 2021.08 | <b>1.03</b> | 0.33 | <b>4.50</b> | 0.64 | 5 |
| Myelin basic protein                    | Cyto | N-term | (Ac-ASQKRPSQRSKYLATAST) | Cortex            | 4 | 2 | 2021.09 | 2021.08 | <b>1.49</b> | 1.47 | <b>1.30</b> | 0.22 | 3 |
| Myelin basic protein                    | Cyto | N-term | (Ac-ASQKRPSQRSKYLATAST) | Hypothalamus      | 4 | 2 | 2021.08 | 2021.08 | <b>1.01</b> | 0.21 | <b>1.71</b> | 0.11 | 4 |
| Myelin basic protein                    | Cyto | N-term | Ac-ASQKRPSQRSKYLATASTM  | Hypothalamus      | 4 | 2 | 2152.15 | 2152.12 | <b>1.01</b> | 0.19 | <b>0.57</b> | 0.19 | 2 |
| Myelin basic protein                    | Cyto | N-term | Ac-ASQKRPSQRSKYLATASTMD | Amygdala          | 4 | 2 | 2267.22 | 2267.14 | <b>1.02</b> | 0.21 | <b>1.04</b> | 0.23 | 3 |
| Neurogranin                             | Cyto | 54-68  | KGPGGGGGAGGAR           | Prefrontal Cortex | 3 | 2 | 1191.65 | 1191.61 | nd          |      | >5          |      | 5 |
| Neurogranin                             | Cyto | 54-68  | KGPGGGGGAGGAR           | Striatum          | 3 | 2 | 1191.66 | 1191.61 | nd          |      | >5          |      | 5 |
| Neurogranin                             | Cyto | C-term | KGPGGGGGAGGARGGAGGGPSGD | Amygdala          | 3 | 1 | 1903.93 | 1903.89 | <b>1.37</b> | 1.24 | <b>0.76</b> | 0.28 | 3 |
| Neurogranin                             | Cyto | C-term | KGPGGGGGAGGARGGAGGGPSGD | Amygdala          | 3 | 1 | 1903.96 | 1903.89 | <b>1.31</b> | 1.11 | <b>0.76</b> | 0.31 | 3 |
| Neurogranin                             | Cyto | C-term | KGPGGGGGAGGARGGAGGGPSGD | Amygdala          | 3 | 2 | 1903.94 | 1903.89 | nd          |      | >5          |      | 5 |
| Neurogranin                             | Cyto | C-term | KGPGGGGGAGGARGGAGGGPSGD | Cortex            | 3 | 1 | 1903.98 | 1903.89 | <b>1.16</b> | 0.75 | <b>3.65</b> | 2.22 | 5 |
| Neurogranin                             | Cyto | C-term | KGPGGGGGAGGARGGAGGGPSGD | Cortex            | 3 | 2 | 1903.93 | 1903.89 | nd          |      | >5          |      | 5 |
| Neurogranin                             | Cyto | C-term | KGPGGGGGAGGARGGAGGGPSGD | Hypothalamus      | 3 | 1 | 1903.93 | 1903.89 | <b>1.07</b> | 0.44 | <b>1.29</b> | 0.04 | 3 |
| Neurogranin                             | Cyto | C-term | KGPGGGGGAGGARGGAGGGPSGD | Prefrontal Cortex | 3 | 1 | 1903.91 | 1903.89 | <b>1.18</b> | 0.81 | <b>1.71</b> | 0.36 | 4 |
| Neurogranin                             | Cyto | C-term | KGPGGGGGAGGARGGAGGGPSGD | Prefrontal Cortex | 3 | 2 | 1903.88 | 1903.89 | nd          |      | >5          |      | 5 |
| Neurogranin                             | Cyto | C-term | KGPGGGGGAGGARGGAGGGPSGD | Striatum          | 3 | 1 | 1903.91 | 1903.89 | <b>1.10</b> | 0.58 | <b>2.80</b> | 0.67 | 4 |
| Neurogranin                             | Cyto | C-term | KGPGGGGGAGGARGGAGGGPSGD | Striatum          | 3 | 2 | 1903.96 | 1903.89 | nd          |      | >5          |      | 5 |
| PC4 and SFRS1-interacting protein (Lens | Nuc  | N-term | Ac-TRDFKPGDLIFA         | Amygdala          | 2 | 1 | 1420.72 | 1420.74 | nd          |      | >5          |      | 5 |

|                                                                           |      |        |                 |                   |   |   |         |         |    |  |    |  |   |
|---------------------------------------------------------------------------|------|--------|-----------------|-------------------|---|---|---------|---------|----|--|----|--|---|
| epithelium-derived growth factor)                                         |      |        |                 |                   |   |   |         |         |    |  |    |  |   |
| PC4 and SFRS1-interacting protein (Lens epithelium-derived growth factor) | Nuc  | N-term | Ac-TRDFKPGDLIFA | Amygdala          | 2 | 1 | 1420.73 | 1420.74 | nd |  | >3 |  | 5 |
| PC4 and SFRS1-interacting protein (Lens epithelium-derived growth factor) | Nuc  | N-term | Ac-TRDFKPGDLIFA | Amygdala          | 2 | 1 | 1420.75 | 1420.74 | nd |  | >5 |  | 5 |
| PC4 and SFRS1-interacting protein (Lens epithelium-derived growth factor) | Nuc  | N-term | Ac-TRDFKPGDLIFA | Cortex            | 2 | 1 | 1420.76 | 1420.74 | nd |  | >5 |  | 5 |
| PC4 and SFRS1-interacting protein (Lens epithelium-derived growth factor) | Nuc  | N-term | Ac-TRDFKPGDLIFA | Hypothalamus      | 2 | 1 | 1420.74 | 1420.74 | nd |  | >5 |  | 5 |
| PC4 and SFRS1-interacting protein (Lens epithelium-derived growth factor) | Nuc  | N-term | Ac-TRDFKPGDLIFA | Hypothalamus      | 2 | 1 | 1420.77 | 1420.74 | nd |  | >5 |  | 5 |
| PC4 and SFRS1-interacting protein (Lens epithelium-derived growth factor) | Nuc  | N-term | Ac-TRDFKPGDLIFA | Striatum          | 2 | 1 | 1420.73 | 1420.74 | nd |  | >5 |  | 5 |
| Peptidylprolyl isomerase A                                                | Cyto | 92-100 | HTGPGILSM       | Hypothalamus      | 2 | 1 | 911.46  | 911.45  | nd |  | >5 |  | 5 |
| Peptidylprolyl isomerase A                                                | Cyto | 40-48  | STGEKGFY        | Striatum          | 2 | 2 | 944.42  | 944.42  | nd |  | >5 |  | 5 |
| Peptidylprolyl isomerase A                                                | Cyto | 26-35  | ADKVPKTAEN      | Prefrontal Cortex | 3 | 3 | 1071.57 | 1071.56 | nd |  | >3 |  | 5 |
| Peptidylprolyl isomerase A                                                | Cyto | 40-50  | STGEKGFYKYG     | Amygdala          | 3 | 2 | 1129.55 | 1129.54 | nd |  | >5 |  | 5 |
| Peptidylprolyl isomerase A                                                | Cyto | 40-50  | STGEKGFYKYG     | Striatum          | 3 | 3 | 1129.58 | 1129.54 | nd |  | >5 |  | 5 |
| Peptidylprolyl isomerase A                                                | Cyto | 84-92  | EDENFILKH       | Amygdala          | 3 | 1 | 1143.57 | 1143.56 | nd |  | >5 |  | 5 |
| Peptidylprolyl isomerase A                                                | Cyto | 84-92  | EDENFILKH       | Hypothalamus      | 3 | 2 | 1143.55 | 1143.56 | nd |  | >5 |  | 5 |
| Peptidylprolyl isomerase A                                                | Cyto | 84-92  | EDENFILKH       | Hypothalamus      | 3 | 2 | 1143.56 | 1143.56 | nd |  | >5 |  | 5 |

|                            |      |         |              |                   |   |   |         |         |    |    |   |
|----------------------------|------|---------|--------------|-------------------|---|---|---------|---------|----|----|---|
| Peptidylprolyl isomerase A | Cyto | 84-92   | EDENFILKH    | Prefrontal Cortex | 3 | 2 | 1143.56 | 1143.56 | nd | >5 | 5 |
| Peptidylprolyl isomerase A | Cyto | 84-92   | EDENFILKH    | Striatum          | 3 | 2 | 1143.57 | 1143.56 | nd | >5 | 5 |
| Peptidylprolyl isomerase A | Cyto | 30-39   | PKTAENFRAL   | Amygdala          | 3 | 1 | 1145.58 | 1145.62 | nd | >5 | 5 |
| Peptidylprolyl isomerase A | Cyto | 30-39   | PKTAENFRAL   | Amygdala          | 3 | 1 | 1145.63 | 1145.62 | nd | >5 | 5 |
| Peptidylprolyl isomerase A | Cyto | 30-39   | PKTAENFRAL   | Cortex            | 3 | 2 | 1145.57 | 1145.62 | nd | >5 | 5 |
| Peptidylprolyl isomerase A | Cyto | 30-39   | PKTAENFRAL   | Hypothalamus      | 3 | 2 | 1145.61 | 1145.62 | nd | >5 | 5 |
| Peptidylprolyl isomerase A | Cyto | 30-39   | PKTAENFRAL   | Striatum          | 3 | 2 | 1145.63 | 1145.62 | nd | >5 | 5 |
| Peptidylprolyl isomerase A | Cyto | 12-22   | ADDEPLGRVSF  | Hypothalamus      | 2 | 1 | 1204.57 | 1204.57 | nd | >5 | 5 |
| Peptidylprolyl isomerase A | Cyto | 12-22   | ADDEPLGRVSF  | Hypothalamus      | 2 | 1 | 1204.57 | 1204.57 | nd | >5 | 5 |
| Peptidylprolyl isomerase A | Cyto | 12-22   | ADDEPLGRVSF  | Prefrontal Cortex | 2 | 1 | 1204.59 | 1204.57 | nd | >3 | 5 |
| Peptidylprolyl isomerase A | Cyto | 12-22   | ADDEPLGRVSF  | Striatum          | 2 | 1 | 1204.61 | 1204.57 | nd | >5 | 5 |
| Peptidylprolyl isomerase A | Cyto | 26-36   | ADKVPKTAENF  | Amygdala          | 3 | 3 | 1218.56 | 1218.62 | nd | >5 | 5 |
| Peptidylprolyl isomerase A | Cyto | 26-36   | ADKVPKTAENF  | Amygdala          | 3 | 3 | 1218.60 | 1218.62 | nd | >5 | 5 |
| Peptidylprolyl isomerase A | Cyto | 26-36   | ADKVPKTAENF  | Cortex            | 3 | 3 | 1218.62 | 1218.62 | nd | >5 | 5 |
| Peptidylprolyl isomerase A | Cyto | 26-36   | ADKVPKTAENF  | Hypothalamus      | 3 | 3 | 1218.61 | 1218.62 | nd | >5 | 5 |
| Peptidylprolyl isomerase A | Cyto | 26-36   | ADKVPKTAENF  | Hypothalamus      | 3 | 3 | 1218.62 | 1218.62 | nd | >5 | 5 |
| Peptidylprolyl isomerase A | Cyto | 26-36   | ADKVPKTAENF  | Hypothalamus      | 3 | 3 | 1218.66 | 1218.62 | nd | >5 | 5 |
| Peptidylprolyl isomerase A | Cyto | 26-36   | ADKVPKTAENF  | Prefrontal Cortex | 3 | 3 | 1218.62 | 1218.62 | nd | >5 | 5 |
| Peptidylprolyl isomerase A | Cyto | 26-36   | ADKVPKTAENF  | Striatum          | 2 | 3 | 1218.66 | 1218.62 | nd | >5 | 5 |
| Peptidylprolyl isomerase A | Cyto | 26-36   | ADKVPKTAENF  | Striatum          | 3 | 3 | 1218.57 | 1218.62 | nd | >5 | 5 |
| Peptidylprolyl isomerase A | Cyto | 26-36   | ADKVPKTAENF  | Amygdala          | 3 | 2 | 1218.57 | 1218.62 | nd | >5 | 5 |
| Peptidylprolyl isomerase A | Cyto | 26-36   | ADKVPKTAENF  | Amygdala          | 3 | 3 | 1218.62 | 1218.62 | nd | >5 | 5 |
| Peptidylprolyl isomerase A | Cyto | 72-83   | GTGGRSIYGEKF | Cortex            | 3 | 2 | 1270.65 | 1270.63 | nd | >5 | 5 |
| Peptidylprolyl isomerase A | Cyto | 130-141 | GKVKEGMNIVEA | Amygdala          | 3 | 2 | 1273.62 | 1273.67 | nd | >5 | 5 |
| Peptidylprolyl isomerase A | Cyto | 130-141 | GKVKEGMNIVEA | Amygdala          | 3 | 3 | 1273.61 | 1273.67 | nd | >5 | 5 |
| Peptidylprolyl isomerase A | Cyto | 130-141 | GKVKEGMNIVEA | Cortex            | 3 | 3 | 1273.62 | 1273.67 | nd | >5 | 5 |
| Peptidylprolyl isomerase A | Cyto | 130-141 | GKVKEGMNIVEA | Hypothalamus      | 2 | 3 | 1273.68 | 1273.67 | nd | >5 | 5 |
| Peptidylprolyl isomerase A | Cyto | 130-141 | GKVKEGMNIVEA | Hypothalamus      | 3 | 2 | 1273.63 | 1273.67 | nd | >5 | 5 |
| Peptidylprolyl isomerase A | Cyto | 130-141 | GKVKEGMNIVEA | Hypothalamus      | 3 | 3 | 1273.67 | 1273.67 | nd | >5 | 5 |
| Peptidylprolyl isomerase A | Cyto | 130-141 | GKVKEGMNIVEA | Prefrontal Cortex | 3 | 3 | 1273.67 | 1273.67 | nd | >3 | 5 |
| Peptidylprolyl isomerase A | Cyto | 130-141 | GKVKEGMNIVEA | Striatum          | 3 | 3 | 1273.66 | 1273.67 | nd | >5 | 5 |

|                            |      |         |                 |                   |   |   |         |         |      |      |      |      |   |
|----------------------------|------|---------|-----------------|-------------------|---|---|---------|---------|------|------|------|------|---|
| Peptidylprolyl isomerase A | Cyto | 40-52   | STGEKGFYKGS     | Striatum          | 3 | 3 | 1303.64 | 1303.60 | nd   |      | >5   |      | 5 |
| Peptidylprolyl isomerase A | Cyto | 119-129 | TEWLDGKHVVF     | Amygdala          | 3 | 2 | 1329.69 | 1329.67 | nd   |      | >5   |      | 5 |
| Peptidylprolyl isomerase A | Cyto | 119-129 | TEWLDGKHVVF     | Striatum          | 3 | 2 | 1329.70 | 1329.67 | nd   |      | >5   |      | 5 |
| Peptidylprolyl isomerase A | Cyto | 26-37   | ADKVPKTAENFR    | Amygdala          | 4 | 2 | 1374.69 | 1374.73 | nd   |      | >5   |      | 5 |
| Peptidylprolyl isomerase A | Cyto | 26-37   | ADKVPKTAENFR    | Hypothalamus      | 4 | 2 | 1374.70 | 1374.73 | nd   |      | >5   |      | 5 |
| Peptidylprolyl isomerase A | Cyto | 26-38   | (ADKVPKTAENFRA) | Amygdala          | 4 | 2 | 1445.79 | 1445.76 | nd   |      | >5   |      | 5 |
| Peptidylprolyl isomerase A | Cyto | 26-38   | (ADKVPKTAENFRA) | Hypothalamus      | 4 | 2 | 1445.77 | 1445.76 | nd   |      | >5   |      | 5 |
| Peptidylprolyl isomerase A | Cyto | 26-38   | (ADKVPKTAENFRA) | Striatum          | 4 | 3 | 1445.80 | 1445.76 | nd   |      | >5   |      | 5 |
| Peptidylprolyl isomerase A | Cyto | 40-53   | STGEKGFYKGS     | Amygdala          | 3 | 2 | 1450.65 | 1450.67 | nd   |      | >5   |      | 5 |
| Peptidylprolyl isomerase A | Cyto | 40-53   | STGEKGFYKGS     | Hypothalamus      | 3 | 2 | 1450.63 | 1450.67 | nd   |      | >5   |      | 5 |
| Peptidylprolyl isomerase A | Cyto | 40-53   | STGEKGFYKGS     | Amygdala          | 3 | 3 | 1450.63 | 1450.67 | nd   |      | >3   |      | 5 |
| Peptidylprolyl isomerase A | Cyto | 40-53   | STGEKGFYKGS     | Amygdala          | 3 | 3 | 1450.66 | 1450.67 | nd   |      | >5   |      | 5 |
| Peptidylprolyl isomerase A | Cyto | 40-53   | STGEKGFYKGS     | Cortex            | 3 | 3 | 1450.70 | 1450.67 | nd   |      | >5   |      | 5 |
| Peptidylprolyl isomerase A | Cyto | 40-53   | STGEKGFYKGS     | Hypothalamus      | 3 | 2 | 1450.68 | 1450.67 | nd   |      | >5   |      | 5 |
| Peptidylprolyl isomerase A | Cyto | 40-53   | STGEKGFYKGS     | Hypothalamus      | 3 | 3 | 1450.67 | 1450.67 | nd   |      | >5   |      | 5 |
| Peptidylprolyl isomerase A | Cyto | 40-53   | STGEKGFYKGS     | Prefrontal Cortex | 3 | 3 | 1450.69 | 1450.67 | nd   |      | >5   |      | 5 |
| Peptidylprolyl isomerase A | Cyto | 118-129 | KTEWLDGKHVVF    | Amygdala          | 3 | 2 | 1457.72 | 1457.77 | nd   |      | >5   |      | 5 |
| Peptidylprolyl isomerase A | Cyto | 118-129 | KTEWLDGKHVVF    | Amygdala          | 3 | 3 | 1457.72 | 1457.77 | nd   |      | >5   |      | 5 |
| Peptidylprolyl isomerase A | Cyto | 118-129 | KTEWLDGKHVVF    | Amygdala          | 4 | 2 | 1457.74 | 1457.77 | nd   |      | >5   |      | 5 |
| Peptidylprolyl isomerase A | Cyto | 118-129 | KTEWLDGKHVVF    | Amygdala          | 4 | 3 | 1457.68 | 1457.77 | nd   |      | >5   |      | 5 |
| Peptidylprolyl isomerase A | Cyto | 118-129 | KTEWLDGKHVVF    | Amygdala          | 4 | 3 | 1457.71 | 1457.77 | nd   |      | >5   |      | 5 |
| Peptidylprolyl isomerase A | Cyto | 118-129 | KTEWLDGKHVVF    | Amygdala          | 4 | 3 | 1457.76 | 1457.77 | nd   |      | >5   |      | 5 |
| Peptidylprolyl isomerase A | Cyto | 118-129 | KTEWLDGKHVVF    | Hypothalamus      | 3 | 3 | 1457.76 | 1457.77 | nd   |      | >5   |      | 5 |
| Peptidylprolyl isomerase A | Cyto | 118-129 | KTEWLDGKHVVF    | Hypothalamus      | 4 | 2 | 1457.74 | 1457.77 | nd   |      | >5   |      | 5 |
| Peptidylprolyl isomerase A | Cyto | 118-129 | KTEWLDGKHVVF    | Hypothalamus      | 4 | 3 | 1457.77 | 1457.77 | nd   |      | >5   |      | 5 |
| Peptidylprolyl isomerase A | Cyto | 118-129 | KTEWLDGKHVVF    | Hypothalamus      | 4 | 3 | 1457.77 | 1457.77 | nd   |      | >5   |      | 5 |
| Peptidylprolyl isomerase A | Cyto | 118-129 | KTEWLDGKHVVF    | Striatum          | 4 | 3 | 1457.82 | 1457.77 | nd   |      | >5   |      | 5 |
| Peptidylprolyl isomerase A | Cyto | 27-39   | DKVPKTAENFRAL   | Cortex            | 4 | 3 | 1487.86 | 1487.81 | nd   |      | >5   |      | 5 |
| Peptidylprolyl isomerase A | Cyto | 27-39   | DKVPKTAENFRAL   | Striatum          | 4 | 3 | 1487.83 | 1487.81 | nd   |      | >5   |      | 5 |
| Peptidylprolyl isomerase A | Cyto | 117-129 | AKTEWLDGKHVVF   | Amygdala          | 4 | 2 | 1528.76 | 1528.80 | nd   |      | >5   |      | 5 |
| Peptidylprolyl isomerase A | Cyto | 117-129 | AKTEWLDGKHVVF   | Hypothalamus      | 4 | 2 | 1528.83 | 1528.80 | 1.03 | 0.31 | 7.85 | 0.92 | 5 |
| Peptidylprolyl isomerase A | Cyto | 117-129 | AKTEWLDGKHVVF   | Hypothalamus      | 4 | 3 | 1528.79 | 1528.80 | nd   |      | >5   |      | 5 |

|                            |      |         |                   |                   |   |   |         |         |      |      |      |      |   |
|----------------------------|------|---------|-------------------|-------------------|---|---|---------|---------|------|------|------|------|---|
| Peptidylprolyl isomerase A | Cyto | 9-22    | DITADDEPLGRVSF    | Hypothalamus      | 2 | 1 | 1533.73 | 1533.73 | nd   |      | >5   |      | 5 |
| Peptidylprolyl isomerase A | Cyto | 26-39   | ADKVPKTAENFRAL    | Amygdala          | 3 | 2 | 1558.77 | 1558.85 | nd   |      | >5   |      | 5 |
| Peptidylprolyl isomerase A | Cyto | 26-39   | ADKVPKTAENFRAL    | Amygdala          | 3 | 3 | 1558.79 | 1558.85 | nd   |      | >5   |      | 5 |
| Peptidylprolyl isomerase A | Cyto | 26-39   | ADKVPKTAENFRAL    | Amygdala          | 4 | 2 | 1558.83 | 1558.85 | nd   |      | >10  |      | 5 |
| Peptidylprolyl isomerase A | Cyto | 26-39   | ADKVPKTAENFRAL    | Amygdala          | 4 | 3 | 1558.80 | 1558.85 | nd   |      | >5   |      | 5 |
| Peptidylprolyl isomerase A | Cyto | 26-39   | ADKVPKTAENFRAL    | Amygdala          | 4 | 3 | 1558.81 | 1558.85 | nd   |      | >3   |      | 5 |
| Peptidylprolyl isomerase A | Cyto | 26-39   | ADKVPKTAENFRAL    | Amygdala          | 4 | 3 | 1558.83 | 1558.85 | nd   |      | >5   |      | 5 |
| Peptidylprolyl isomerase A | Cyto | 26-39   | ADKVPKTAENFRAL    | Cortex            | 3 | 3 | 1558.82 | 1558.85 | nd   |      | >5   |      | 5 |
| Peptidylprolyl isomerase A | Cyto | 26-39   | ADKVPKTAENFRAL    | Cortex            | 4 | 3 | 1558.73 | 1558.85 | nd   |      | >5   |      | 5 |
| Peptidylprolyl isomerase A | Cyto | 26-39   | ADKVPKTAENFRAL    | Hypothalamus      | 3 | 3 | 1558.85 | 1558.85 | nd   |      | >5   |      | 5 |
| Peptidylprolyl isomerase A | Cyto | 26-39   | ADKVPKTAENFRAL    | Hypothalamus      | 3 | 3 | 1558.85 | 1558.85 | nd   |      | >5   |      | 5 |
| Peptidylprolyl isomerase A | Cyto | 26-39   | ADKVPKTAENFRAL    | Hypothalamus      | 4 | 2 | 1558.85 | 1558.85 | 1.00 | 0.01 | >10  | 6.50 | 5 |
| Peptidylprolyl isomerase A | Cyto | 26-39   | ADKVPKTAENFRAL    | Hypothalamus      | 4 | 3 | 1558.79 | 1558.85 | nd   |      | >5   |      | 5 |
| Peptidylprolyl isomerase A | Cyto | 26-39   | ADKVPKTAENFRAL    | Hypothalamus      | 4 | 3 | 1558.82 | 1558.85 | nd   |      | >5   |      | 5 |
| Peptidylprolyl isomerase A | Cyto | 26-39   | ADKVPKTAENFRAL    | Hypothalamus      | 4 | 3 | 1558.85 | 1558.85 | nd   |      | >5   |      | 5 |
| Peptidylprolyl isomerase A | Cyto | 26-39   | ADKVPKTAENFRAL    | Prefrontal Cortex | 4 | 3 | 1558.87 | 1558.85 | nd   |      | >5   |      | 5 |
| Peptidylprolyl isomerase A | Cyto | 26-39   | ADKVPKTAENFRAL    | Striatum          | 3 | 3 | 1558.91 | 1558.85 | nd   |      | >5   |      | 5 |
| Peptidylprolyl isomerase A | Cyto | 26-39   | ADKVPKTAENFRAL    | Striatum          | 4 | 3 | 1558.89 | 1558.85 | nd   |      | >5   |      | 5 |
| Peptidylprolyl isomerase A | Cyto | 23-36   | ELFADKVPKTAENF    | Hypothalamus      | 3 | 3 | 1607.81 | 1607.82 | nd   |      | >5   |      | 5 |
| Peptidylprolyl isomerase A | Cyto | 8-22    | FDITADDEPLGRVSF   | Amygdala          | 2 | 1 | 1680.84 | 1680.80 | nd   |      | >5   |      | 5 |
| Peptidylprolyl isomerase A | Cyto | 8-22    | FDITADDEPLGRVSF   | Cortex            | 2 | 1 | 1680.85 | 1680.80 | nd   |      | >5   |      | 5 |
| Peptidylprolyl isomerase A | Cyto | 8-22    | FDITADDEPLGRVSF   | Hypothalamus      | 2 | 1 | 1680.80 | 1680.80 | nd   |      | >5   |      | 5 |
| Peptidylprolyl isomerase A | Cyto | 130-145 | GKVKEGMNIVEAMERF  | Amygdala          | 4 | 3 | 1836.89 | 1836.92 | nd   |      | >5   |      | 5 |
| Peptidylprolyl isomerase A | Cyto | 84-100  | EDENFILKHTGPGILSM | Cortex            | 3 | 2 | 1899.97 | 1899.94 | nd   |      | >5   |      | 5 |
| Peptidylprolyl isomerase A | Cyto | 84-100  | EDENFILKHTGPGILSM | Amygdala          | 2 | 1 | 1899.91 | 1899.95 | nd   |      | >5   |      | 5 |
| Peptidylprolyl isomerase A | Cyto | 84-100  | EDENFILKHTGPGILSM | Amygdala          | 3 | 1 | 1899.93 | 1899.95 | 1.00 | 0.82 | 9.33 | 0.67 | 5 |
| Peptidylprolyl isomerase A | Cyto | 84-100  | EDENFILKHTGPGILSM | Amygdala          | 3 | 2 | 1899.88 | 1899.95 | nd   |      | >5   |      | 5 |
| Peptidylprolyl isomerase A | Cyto | 84-100  | EDENFILKHTGPGILSM | Amygdala          | 3 | 2 | 1899.90 | 1899.95 | nd   |      | >5   |      | 5 |
| Peptidylprolyl isomerase A | Cyto | 84-100  | EDENFILKHTGPGILSM | Amygdala          | 3 | 2 | 1899.93 | 1899.95 | nd   |      | >5   |      | 5 |
| Peptidylprolyl isomerase A | Cyto | 84-100  | EDENFILKHTGPGILSM | Hypothalamus      | 3 | 1 | 1899.93 | 1899.95 | nd   |      | >10  |      | 5 |
| Peptidylprolyl isomerase A | Cyto | 84-100  | EDENFILKHTGPGILSM | Hypothalamus      | 3 | 1 | 1899.94 | 1899.95 | 1.01 | 0.20 | 1.62 | 0.70 | 4 |
| Peptidylprolyl isomerase A | Cyto | 84-100  | EDENFILKHTGPGILSM | Hypothalamus      | 3 | 2 | 1899.93 | 1899.95 | 1.16 | 0.70 | 7.78 | 1.22 | 5 |



|                                            |      |        |                       |                   |   |   |         |         |      |      |      |      |   |
|--------------------------------------------|------|--------|-----------------------|-------------------|---|---|---------|---------|------|------|------|------|---|
| Peptidylprolyl isomerase A                 | Cyto | 23-39  | ELFADKVPKTAENFRAL     | Amygdala          | 4 | 2 | 1948.03 | 1948.04 | nd   |      | >5   |      | 5 |
| Peptidylprolyl isomerase A                 | Cyto | 23-39  | ELFADKVPKTAENFRAL     | Amygdala          | 4 | 3 | 1947.97 | 1948.04 | nd   |      | >5   |      | 5 |
| Peptidylprolyl isomerase A                 | Cyto | 23-39  | ELFADKVPKTAENFRAL     | Hypothalamus      | 3 | 3 | 1948.03 | 1948.04 | nd   |      | >5   |      | 5 |
| Peptidylprolyl isomerase A                 | Cyto | 23-39  | ELFADKVPKTAENFRAL     | Hypothalamus      | 4 | 2 | 1948.06 | 1948.04 | 2.66 | 3.42 | 3.95 | 1.74 | 5 |
| Peptidylprolyl isomerase A                 | Cyto | N-term | VNPTVFFDITADDEPLGRVSF | Amygdala          | 2 | 1 | 2338.16 | 2338.15 | nd   |      | >3   |      | 5 |
| Peptidylprolyl isomerase A                 | Cyto | N-term | VNPTVFFDITADDEPLGRVSF | Amygdala          | 2 | 1 | 2338.16 | 2338.15 | nd   |      | >5   |      | 5 |
| Peptidylprolyl isomerase A                 | Cyto | N-term | VNPTVFFDITADDEPLGRVSF | Amygdala          | 2 | 1 | 2338.20 | 2338.15 | nd   |      | >5   |      | 5 |
| Peptidylprolyl isomerase A                 | Cyto | N-term | VNPTVFFDITADDEPLGRVSF | Amygdala          | 3 | 1 | 2338.15 | 2338.15 | nd   |      | >5   |      | 5 |
| Peptidylprolyl isomerase A                 | Cyto | N-term | VNPTVFFDITADDEPLGRVSF | Amygdala          | 3 | 1 | 2338.21 | 2338.15 | nd   |      | >5   |      | 5 |
| Peptidylprolyl isomerase A                 | Cyto | N-term | VNPTVFFDITADDEPLGRVSF | Hypothalamus      | 3 | 1 | 2338.19 | 2338.15 | 1.02 | 0.25 | 2.67 | 0.67 | 4 |
| Peroxiredoxin V                            | Mito | N-term | APIKVGDAIPSVEVF       | Amygdala          | 2 | 1 | 1540.87 | 1540.85 | nd   |      | >5   |      | 5 |
| Phosphatidylethanolamine-binding protein 1 | Cyto | 59-66  | DPGKLYTL              | Amygdala          | 2 | 1 | 905.48  | 905.49  | nd   |      | >5   |      | 5 |
| Phosphatidylethanolamine-binding protein 1 | Cyto | 59-66  | DPGKLYTL              | Cortex            | 2 | 2 | 905.50  | 905.49  | nd   |      | >5   |      | 5 |
| Phosphatidylethanolamine-binding protein 1 | Cyto | 59-66  | DPGKLYTL              | Striatum          | 2 | 2 | 905.47  | 905.49  | nd   |      | >5   |      | 5 |
| Phosphatidylethanolamine-binding protein 1 | Cyto | 93-103 | KGNDISSGTVL           | Amygdala          | 2 | 1 | 1089.54 | 1089.57 | nd   |      | >5   |      | 5 |
| Phosphatidylethanolamine-binding protein 1 | Cyto | 93-103 | KGNDISSGTVL           | Amygdala          | 2 | 2 | 1089.57 | 1089.57 | nd   |      | >5   |      | 5 |
| Phosphatidylethanolamine-binding protein 1 | Cyto | 93-103 | KGNDISSGTVL           | Cortex            | 2 | 2 | 1089.58 | 1089.57 | nd   |      | >5   |      | 5 |
| Phosphatidylethanolamine-binding protein 1 | Cyto | 93-103 | KGNDISSGTVL           | Hypothalamus      | 2 | 1 | 1089.57 | 1089.57 | nd   |      | >5   |      | 5 |
| Phosphatidylethanolamine-binding protein 1 | Cyto | 93-103 | KGNDISSGTVL           | Hypothalamus      | 2 | 2 | 1089.57 | 1089.57 | nd   |      | >5   |      | 5 |
| Phosphatidylethanolamine-binding protein 1 | Cyto | 93-103 | KGNDISSGTVL           | Hypothalamus      | 2 | 2 | 1089.57 | 1089.57 | nd   |      | >5   |      | 5 |
| Phosphatidylethanolamine-binding protein 1 | Cyto | 93-103 | KGNDISSGTVL           | Hypothalamus      | 2 | 2 | 1089.59 | 1089.57 | nd   |      | >5   |      | 5 |
| Phosphatidylethanolamine-binding protein 1 | Cyto | 93-103 | KGNDISSGTVL           | Prefrontal Cortex | 2 | 2 | 1089.57 | 1089.57 | nd   |      | >3   |      | 5 |
| Phosphatidylethanolamine-binding protein 1 | Cyto | 93-103 | KGNDISSGTVL           | Striatum          | 2 | 2 | 1089.56 | 1089.57 | nd   |      | >5   |      | 5 |
| Phosphatidylethanolamine-binding protein 1 | Cyto | 93-103 | KGNDISSGTVL           | Striatum          | 3 | 2 | 1089.57 | 1089.57 | nd   |      | >5   |      | 5 |
| Phosphatidylethanolamine-binding protein 1 | Cyto | 30-46  | AGVTVDELGKVLTPQV      | Amygdala          | 2 | 1 | 1725.97 | 1725.95 | nd   |      | >5   |      | 5 |
| Phosphatidylethanolamine-binding protein 1 | Cyto | 30-46  | AGVTVDELGKVLTPQV      | Cortex            | 2 | 2 | 1725.98 | 1725.95 | nd   |      | >5   |      | 5 |
| Phosphatidylethanolamine-binding protein 1 | Cyto | 30-46  | AGVTVDELGKVLTPQV      | Cortex            | 3 | 2 | 1726.00 | 1725.95 | nd   |      | >5   |      | 5 |
| Phosphatidylethanolamine-binding protein 1 | Cyto | 30-46  | AGVTVDELGKVLTPQV      | Hypothalamus      | 3 | 2 | 1725.95 | 1725.95 | nd   |      | >5   |      | 5 |

|                                            |      |                |                                                                     |              |    |   |         |         |      |      |      |      |   |
|--------------------------------------------|------|----------------|---------------------------------------------------------------------|--------------|----|---|---------|---------|------|------|------|------|---|
| Phosphatidylethanolamine-binding protein 1 | Cyto | 104-120        | SDYVGSPPSGTGLHRY                                                    | Striatum     | 3  | 1 | 1748.84 | 1748.81 | nd   |      | >5   |      | 5 |
| Phosphatidylethanolamine-binding protein 1 | Cyto | C-term         | WDDYVPKLYEQLSGK                                                     | Amygdala     | 3  | 3 | 1839.83 | 1839.90 | nd   |      | >3   |      | 5 |
| Phosphatidylethanolamine-binding protein 1 | Cyto | 50-66          | PSSISWDGLDPGKLYTL                                                   | Amygdala     | 2  | 1 | 1847.96 | 1847.93 | nd   |      | >5   |      | 5 |
| Phosphatidylethanolamine-binding protein 1 | Cyto | C-term         | EWDDYVPKLYEQLSGK                                                    | Amygdala     | 3  | 2 | 1968.96 | 1968.95 | 1.00 | 0.01 | 4.17 | 1.50 | 5 |
| Phosphatidylethanolamine-binding protein 1 | Cyto | C-term         | EWDDYVPKLYEQLSGK                                                    | Amygdala     | 3  | 3 | 1968.84 | 1968.95 | nd   |      | >5   |      | 5 |
| Phosphatidylethanolamine-binding protein 1 | Cyto | C-term         | EWDDYVPKLYEQLSGK                                                    | Cortex       | 3  | 3 | 1968.98 | 1968.95 | nd   |      | >5   |      | 5 |
| Phosphatidylethanolamine-binding protein 1 | Cyto | C-term         | EWDDYVPKLYEQLSGK                                                    | Hypothalamus | 3  | 2 | 1968.96 | 1968.95 | 1.04 | 0.38 | 1.38 | 0.12 | 3 |
| Phosphatidylethanolamine-binding protein 1 | Cyto | 48-65          | RPSSISWDGLDPGKLYTL                                                  | Amygdala     | 3  | 1 | 2004.05 | 2004.03 | nd   |      | >5   |      | 5 |
| Phosphatidylethanolamine-binding protein 1 | Cyto | 48-66          | NRPSSISWDGLDPGKLYTL                                                 | Amygdala     | 3  | 1 | 2118.10 | 2118.08 | nd   |      | >5   |      | 5 |
| Phosphatidylethanolamine-binding protein 1 | Cyto | C-term         | QAEWDDYVPKLYEQLSGK                                                  | Amygdala     | 3  | 2 | 2168.00 | 2168.04 | nd   |      | >5   |      | 5 |
| Phosphatidylethanolamine-binding protein 1 | Cyto | C-term         | QAEWDDYVPKLYEQLSGK                                                  | Cortex       | 3  | 3 | 2168.12 | 2168.04 | nd   |      | >5   |      | 5 |
| Phosphatidylethanolamine-binding protein 1 | Cyto | C-term         | QAEWDDYVPKLYEQLSGK                                                  | Hypothalamus | 3  | 2 | 2168.10 | 2168.04 | 1.01 | 0.18 | 1.75 | 0.18 | 4 |
| Phosphatidylethanolamine-binding protein 1 | Cyto | 47-66          | MNRPSSISWDGLDPGKLYTL                                                | Amygdala     | 3  | 1 | 2249.15 | 2249.12 | nd   |      | >5   |      | 5 |
| Phosphatidylethanolamine-binding protein 1 | Cyto | 26-46          | RVDYAGVTDELGKVLPTQV                                                 | Amygdala     | 3  | 1 | 2259.22 | 2259.21 | nd   |      | >5   |      | 5 |
| Phosphatidylethanolamine-binding protein 1 | Cyto | 26-46          | RVDYAGVTDELGKVLPTQV                                                 | Hypothalamus | 3  | 2 | 2259.21 | 2259.21 | nd   |      | >5   |      | 5 |
| Purkinje cell protein 4                    | Cyto | Entire protein | Ac-SERQSAGATNGKDKTSGDNDGQKKVQEEFDIDMD<br>APETERAAVAIQSQRKFQKKKAGSQS | Hypothalamus | 10 | 8 | 6719.17 | 6718.27 | 1.01 | 0.17 | 0.87 | 0.06 | 3 |
| Purkinje cell protein 4                    | Cyto | Entire protein | Ac-SERQSAGATNGKDKTSGDNDGQKKVQEEFDIDMD<br>APETERAAVAIQSQRKFQKKKAGSQS | Hypothalamus | 10 | 8 | 6719.17 | 6718.27 | 1.01 | 0.17 | 0.87 | 0.06 | 3 |
| Purkinje cell protein 4                    | Cyto | Entire protein | Ac-SERQSAGATNGKDKTSGDNDGQKKVQEEFDIDMD<br>APETERAAVAIQSQRKFQKKKAGSQS | Hypothalamus | 11 | 8 | 6719.35 | 6718.27 | 1.00 | 0.06 | 0.90 | 0.04 | 3 |
| Purkinje cell protein 4                    | Cyto | Entire protein | Ac-SERQSAGATNGKDKTSGDNDGQKKVQEEFDIDMD<br>APETERAAVAIQSQRKFQKKKAGSQS | Hypothalamus | 11 | 8 | 6719.35 | 6718.27 | 1.00 | 0.06 | 0.90 | 0.04 | 3 |
| Ribosomal protein S21                      | Cyto | C-term         | KADGIVSKNF                                                          | Cortex       | 3  | 3 | 1077.55 | 1077.58 | nd   |      | >5   |      | 5 |
| Ribosomal protein S21                      | Cyto | C-term         | KADGIVSKNF                                                          | Hypothalamus | 3  | 3 | 1077.55 | 1077.58 | nd   |      | >5   |      | 5 |
| Ribosomal protein S21                      | Cyto | C-term         | KADGIVSKNF                                                          | Striatum     | 3  | 3 | 1077.63 | 1077.58 | nd   |      | >5   |      | 5 |
| Ribosomal protein S21                      | Cyto | C-term         | AKADGIVSKNF                                                         | Hypothalamus | 3  | 2 | 1148.66 | 1148.62 | 1.00 | 0.01 | 5.08 | 1.58 | 5 |
| Ribosomal protein S21                      | Cyto | C-term         | AKADGIVSKNF                                                         | Hypothalamus | 3  | 3 | 1148.61 | 1148.62 | nd   |      | >5   |      | 5 |
| RNA binding motif protein 3                | Cyto | N-term         | Ac-SSEEGKLVFGGLNF                                                   | Amygdala     | 2  | 1 | 1524.74 | 1524.75 | nd   |      | >5   |      | 5 |
| RNA binding motif protein 3                | Cyto | N-term         | Ac-SSEEGKLVFGGLNF                                                   | Cortex       | 2  | 1 | 1524.76 | 1524.75 | nd   |      | >5   |      | 5 |
| RNA binding motif protein 3                | Cyto | N-term         | Ac-SSEEGKLVFGGLNF                                                   | Cortex       | 2  | 1 | 1524.80 | 1524.75 | nd   |      | >5   |      | 5 |

|                                                 |             |         |                               |                   |   |   |         |         |      |      |      |      |   |
|-------------------------------------------------|-------------|---------|-------------------------------|-------------------|---|---|---------|---------|------|------|------|------|---|
| RNA binding motif protein 3                     | Cyto        | N-term  | Ac-SSEEGKLFVGGLNF             | Hypothalamus      | 2 | 1 | 1524.76 | 1524.75 | nd   |      | >5   |      | 5 |
| RNA binding motif protein 3                     | Cyto        | N-term  | Ac-SSEEGKLFVGGLNF             | Prefrontal Cortex | 2 | 1 | 1524.72 | 1524.75 | nd   |      | >5   |      | 5 |
| RNA binding motif protein 3                     | Cyto        | N-term  | Ac-SSEEGKLFVGGLNF             | Striatum          | 2 | 1 | 1524.73 | 1524.75 | nd   |      | >5   |      | 5 |
| Splicing factor, arginine/serine-rich 3 (SRp20) | Cyto        | 43-53   | RNPPGFAFVEF                   | Hypothalamus      | 2 | 1 | 1279.63 | 1279.64 | nd   |      | >5   |      | 5 |
| Synaptosomal-associated protein (Snap91)        | Memb (cyto) | 749-762 | KGLGSDLSSLASL                 | Prefrontal Cortex | 2 | 2 | 1361.68 | 1361.70 | nd   |      | >3   |      | 5 |
| Synaptosomal-associated protein (Snap91)        | Memb (cyto) | 748-762 | SKGLGSDLSSLASL                | Amygdala          | 2 | 1 | 1448.72 | 1448.74 | nd   |      | >5   |      | 5 |
| Synaptosomal-associated protein (Snap91)        | Memb (cyto) | 748-762 | SKGLGSDLSSLASL                | Hypothalamus      | 2 | 1 | 1448.73 | 1448.74 | nd   |      | >5   |      | 5 |
| Synaptosomal-associated protein (Snap91)        | Memb (cyto) | 747-762 | ASKGLGSDLSSLASL               | Amygdala          | 2 | 1 | 1519.75 | 1519.77 | nd   |      | >5   |      | 5 |
| Synaptosomal-associated protein (Snap91)        | Memb (cyto) | C-term  | SPSPTPATQSPKKPPAKDPLADLNIKDFL | Amygdala          | 4 | 4 | 3072.64 | 3072.65 | nd   |      | >5   |      | 5 |
| Synaptosomal-associated protein (Snap91)        | Memb (cyto) | C-term  | SPSPTPATQSPKKPPAKDPLADLNIKDFL | Amygdala          | 4 | 5 | 3072.64 | 3072.65 | nd   |      | >5   |      | 5 |
| Synaptosomal-associated protein (Snap91)        | Memb (cyto) | C-term  | SPSPTPATQSPKKPPAKDPLADLNIKDFL | Amygdala          | 5 | 4 | 3072.49 | 3072.65 | nd   |      | >5   |      | 5 |
| Synaptosomal-associated protein (Snap91)        | Memb (cyto) | C-term  | SPSPTPATQSPKKPPAKDPLADLNIKDFL | Amygdala          | 5 | 5 | 3072.56 | 3072.65 | nd   |      | >5   |      | 5 |
| Synaptosomal-associated protein (Snap91)        | Memb (cyto) | C-term  | SPSPTPATQSPKKPPAKDPLADLNIKDFL | Cortex            | 5 | 5 | 3072.78 | 3072.65 | nd   |      | >5   |      | 5 |
| Synaptosomal-associated protein (Snap91)        | Memb (cyto) | C-term  | SPSPTPATQSPKKPPAKDPLADLNIKDFL | Hypothalamus      | 4 | 4 | 3072.63 | 3072.65 | nd   |      | >5   |      | 5 |
| Synaptosomal-associated protein (Snap91)        | Memb (cyto) | C-term  | SPSPTPATQSPKKPPAKDPLADLNIKDFL | Hypothalamus      | 5 | 4 | 3072.59 | 3072.65 | nd   |      | >5   |      | 5 |
| Synaptosomal-associated protein (Snap91)        | Memb (cyto) | C-term  | SPSPTPATQSPKKPPAKDPLADLNIKDFL | Hypothalamus      | 5 | 5 | 3072.64 | 3072.65 | nd   |      | >5   |      | 5 |
| Synuclein, alpha or beta                        | Cyto        | N-term  | Ac-MDVFMKGL                   | Amygdala          | 2 | 1 | 981.47  | 981.47  | 1.17 | 0.79 | 2.20 | 0.00 | 4 |
| Synuclein, alpha or beta                        | Cyto        | N-term  | Ac-MDVFMKGL                   | Cortex            | 2 | 1 | 981.51  | 981.47  | nd   |      | >3   |      | 5 |
| Synuclein, alpha or beta                        | Cyto        | N-term  | Ac-MDVFMKGL                   | Hypothalamus      | 2 | 1 | 981.46  | 981.47  | 1.00 | 0.10 | 1.88 | 0.53 | 4 |
| Synuclein, beta                                 | Cyto        | N-term  | Ac-MDVFMKGLSM                 | Amygdala          | 2 | 1 | 1199.55 | 1199.54 | nd   |      | >5   |      | 5 |
| Synuclein, beta                                 | Cyto        | N-term  | Ac-MDVFMKGLSM                 | Hypothalamus      | 2 | 1 | 1199.60 | 1199.54 | nd   |      | >5   |      | 5 |
| Thioredoxin 1                                   | Cyto        | N-term  | VKLIESKEAFQEAL                | Amygdala          | 3 | 2 | 1603.84 | 1603.88 | nd   |      | >5   |      | 5 |
| Thioredoxin 1                                   | Cyto        | N-term  | VKLIESKEAFQEAL                | Hypothalamus      | 3 | 2 | 1603.85 | 1603.88 | 1.03 | 0.27 | 1.50 | 0.75 | 4 |
| Thioredoxin 1                                   | Cyto        | N-term  | VKLIESKEAFQEAL                | Striatum          | 3 | 2 | 1603.80 | 1603.88 | nd   |      | >5   |      | 5 |
| Thioredoxin 1                                   | Cyto        | N-term  | VKLIESKEAFQEALAAAGDKLVVDF     | Amygdala          | 4 | 3 | 2789.47 | 2789.52 | 1.02 | 0.24 | 2.05 | 1.05 | 4 |
| Thioredoxin 1                                   | Cyto        | N-term  | VKLIESKEAFQEALAAAGDKLVVDF     | Hypothalamus      | 4 | 3 | 2789.50 | 2789.52 | 1.03 | 0.33 | 1.93 | 0.64 | 4 |
| Thymosin beta-10                                | Cyto        | C-term  | TLPTKETIEQEKRSIS              | Amygdala          | 3 | 2 | 1987.94 | 1988.04 | 1.01 | 0.12 | 0.88 | 0.00 | 3 |
| Thymosin beta-10                                | Cyto        | C-term  | TLPTKETIEQEKRSIS              | Amygdala          | 4 | 2 | 1988.05 | 1988.04 | 1.01 | 0.16 | 0.96 | 0.24 | 3 |

|                  |      |                |                                                 |              |   |   |         |         |      |      |      |      |   |
|------------------|------|----------------|-------------------------------------------------|--------------|---|---|---------|---------|------|------|------|------|---|
| Thymosin beta-10 | Cyto | C-term         | TLPTKETIEQEKRSSEIS                              | Hypothalamus | 3 | 2 | 1988.07 | 1988.04 | 1.01 | 0.17 | 1.08 | 0.05 | 3 |
| Thymosin beta-10 | Cyto | C-term         | TLPTKETIEQEKRSSEIS                              | Hypothalamus | 4 | 2 | 1988.04 | 1988.04 | 1.00 | 0.09 | 0.96 | 0.12 | 3 |
| Thymosin beta-10 | Cyto | Entire protein | Ac-ADKPDMEIASFDKAKLKKTTETQEKNLPTKETIEQEKRSSEIS  | Hypothalamus | 6 | 8 | 4933.44 | 4933.52 | 1.00 | 0.09 | 1.11 | 0.27 | 3 |
| Thymosin beta-10 | Cyto | Entire protein | Ac-ADKPDMEIASFDKAKLKKTTETQEKNLPTKETIEQEKRSSEIS  | Hypothalamus | 7 | 8 | 4933.48 | 4933.52 | 1.02 | 0.25 | 1.01 | 0.31 | 3 |
| Thymosin beta-10 | Cyto | Entire protein | Ac-ADKPDMEIASFDKAKLKKTTETQEKNLPTKETIEQEKRSSEIS  | Amygdala     | 6 | 8 | 4936.47 | 4936.49 | 1.02 | 0.24 | 0.71 | 0.04 | 3 |
| Thymosin beta-10 | Cyto | Entire protein | Ac-ADKPDMEIASFDKAKLKKTTETQEKNLPTKETIEQEKRSSEIS  | Amygdala     | 7 | 8 | 4936.37 | 4936.49 | 1.00 | 0.01 | 0.86 | 0.00 | 3 |
| Thymosin beta-10 | Cyto | Entire protein | Ac-ADKPDMEIASFDKAKLKKTTETQEKNLPTKETIEQEKRSSEIS  | Amygdala     | 8 | 8 | 4935.35 | 4936.49 | 1.01 | 0.15 | 0.76 | 0.05 | 3 |
| Thymosin beta-10 | Cyto | Entire protein | Ac-ADKPDMEIASFDKAKLKKTTETQEKNLPTKETIEQEKRSSEIS  | Amygdala     | 9 | 8 | 4936.32 | 4936.49 | 1.00 | 0.03 | 0.73 | 0.00 | 3 |
| Thymosin beta-10 | Cyto | Entire protein | Ac-ADKPDMEIASFDKAKLKKTTETQEKNLPTKETIEQEKRSSEIS  | Hypothalamus | 6 | 8 | 4936.89 | 4936.49 | 1.00 | 0.05 | 0.84 | 0.00 | 3 |
| Thymosin beta-10 | Cyto | Entire protein | Ac-ADKPDMEIASFDKAKLKKTTETQEKNLPTKETIEQEKRSSEIS  | Hypothalamus | 7 | 8 | 4936.39 | 4936.49 | 1.01 | 0.12 | 0.82 | 0.03 | 3 |
| Thymosin beta-10 | Cyto | Entire protein | Ac-ADKPDMEIASFDKAKLKKTTETQEKNLPTKETIEQEKRSSEIS  | Hypothalamus | 8 | 8 | 4936.32 | 4936.49 | 1.00 | 0.10 | 0.85 | 0.03 | 3 |
| Thymosin beta-10 | Cyto | Entire protein | Ac-ADKPDMEIASFDKAKLKKTTETQEKNLPTKETIEQEKRSSEIS  | Hypothalamus | 9 | 8 | 4936.20 | 4936.49 | 1.00 | 0.08 | 0.91 | 0.03 | 3 |
| Thymosin beta-4  | Cyto | C-term         | PLPSKETIEQEKQAGES                               | Cortex       | 3 | 3 | 1869.98 | 1869.93 | 1.05 | 0.38 | 0.82 | 0.11 | 3 |
| Thymosin beta-4  | Cyto | C-term         | PLPSKETIEQEKQAGES                               | Hypothalamus | 3 | 2 | 1869.97 | 1869.93 | 1.01 | 0.15 | 0.95 | 0.15 | 3 |
| Thymosin beta-4  | Cyto | C-term         | PLPSKETIEQEKQAGES                               | Striatum     | 3 | 3 | 1869.93 | 1869.93 | 1.02 | 0.24 | 0.72 | 0.01 | 3 |
| Thymosin beta-4  | Cyto | Entire protein | Ac-SDKPDMAEIEKFDKSKLKKTTETQEKNPLPSKETIEQEKQAGES | Amygdala     | 5 | 9 | 4961.44 | 4960.49 | 1.01 | 0.19 | 0.91 | 0.04 | 3 |
| Thymosin beta-4  | Cyto | Entire protein | Ac-SDKPDMAEIEKFDKSKLKKTTETQEKNPLPSKETIEQEKQAGES | Amygdala     | 6 | 9 | 4961.29 | 4960.49 | 1.00 | 0.11 | 0.89 | 0.05 | 3 |
| Thymosin beta-4  | Cyto | Entire protein | Ac-SDKPDMAEIEKFDKSKLKKTTETQEKNPLPSKETIEQEKQAGES | Amygdala     | 6 | 9 | 4961.37 | 4960.49 | 1.00 | 0.04 | 0.98 | 0.12 | 3 |
| Thymosin beta-4  | Cyto | Entire protein | Ac-SDKPDMAEIEKFDKSKLKKTTETQEKNPLPSKETIEQEKQAGES | Amygdala     | 7 | 9 | 4961.26 | 4960.49 | 1.00 | 0.04 | 0.92 | 0.10 | 3 |
| Thymosin beta-4  | Cyto | Entire protein | Ac-SDKPDMAEIEKFDKSKLKKTTETQEKNPLPSKETIEQEKQAGES | Amygdala     | 7 | 9 | 4961.34 | 4960.49 | 1.00 | 0.12 | 0.92 | 0.06 | 3 |
| Thymosin beta-4  | Cyto | Entire protein | Ac-SDKPDMAEIEKFDKSKLKKTTETQEKNPLPSKETIEQEKQAGES | Amygdala     | 8 | 9 | 4961.21 | 4960.49 | 1.00 | 0.06 | 0.93 | 0.07 | 3 |
| Thymosin beta-4  | Cyto | Entire protein | Ac-SDKPDMAEIEKFDKSKLKKTTETQEKNPLPSKETIEQEKQAGES | Amygdala     | 8 | 9 | 4961.41 | 4960.49 | 1.00 | 0.04 | 0.96 | 0.11 | 3 |
| Thymosin beta-4  | Cyto | Entire protein | Ac-SDKPDMAEIEKFDKSKLKKTTETQEKNPLPSKETIEQEKQAGES | Amygdala     | 9 | 9 | 4961.27 | 4960.49 | 1.00 | 0.11 | 1.01 | 0.03 | 3 |
| Thymosin beta-4  | Cyto | Entire protein | Ac-SDKPDMAEIEKFDKSKLKKTTETQEKNPLPSKETIEQEKQAGES | Hypothalamus | 6 | 9 | 4960.46 | 4960.49 | 1.03 | 0.28 | 1.07 | 0.38 | 3 |
| Thymosin beta-4  | Cyto | Entire protein | Ac-SDKPDMAEIEKFDKSKLKKTTETQEKNPLPSKETIEQEKQAGES | Hypothalamus | 7 | 9 | 4960.47 | 4960.49 | 1.02 | 0.25 | 1.05 | 0.33 | 3 |
| Thymosin beta-4  | Cyto | Entire protein | Ac-SDKPDMAEIEKFDKSKLKKTTETQEKNPLPSKETIEQEKQAGES | Hypothalamus | 8 | 9 | 4960.45 | 4960.49 | 1.00 | 0.11 | 1.03 | 0.18 | 3 |
| Thymosin beta-4  | Cyto | Entire protein | Ac-SDKPDMAEIEKFDKSKLKKTTETQEKNPLPSKETIEQEKQAGES | Hypothalamus | 9 | 9 | 4960.46 | 4960.49 | 1.00 | 0.12 | 0.91 | 0.22 | 3 |

|                 |      |                                |                                                      |                   |   |   |         |         |      |      |      |      |   |
|-----------------|------|--------------------------------|------------------------------------------------------|-------------------|---|---|---------|---------|------|------|------|------|---|
| Thymosin beta-4 | Cyto | Entire protein                 | Ac-SDKPDMAEIEKFDKSKLKKTTETQEKNPLPSKETIEQE KQAGES     | Amygdala          | 5 | 9 | 4963.39 | 4963.54 | 1.00 | 0.11 | 1.18 | 0.12 | 3 |
| Thymosin beta-4 | Cyto | Entire protein                 | Ac-SDKPDMAEIEKFDKSKLKKTTETQEKNPLPSKETIEQE KQAGES     | Amygdala          | 5 | 9 | 4963.50 | 4963.54 | 1.00 | 0.04 | 0.89 | 0.08 | 3 |
| Thymosin beta-4 | Cyto | Entire protein                 | Ac-SDKPDMAEIEKFDKSKLKKTTETQEKNPLPSKETIEQE KQAGES     | Amygdala          | 6 | 9 | 4963.57 | 4963.54 | 1.01 | 0.15 | 0.86 | 0.04 | 3 |
| Thymosin beta-4 | Cyto | Entire protein                 | Ac-SDKPDMAEIEKFDKSKLKKTTETQEKNPLPSKETIEQE KQAGES     | Amygdala          | 7 | 9 | 4963.21 | 4963.54 | 1.00 | 0.07 | 1.02 | 0.04 | 3 |
| Thymosin beta-4 | Cyto | Entire protein                 | Ac-SDKPDMAEIEKFDKSKLKKTTETQEKNPLPSKETIEQE KQAGES     | Amygdala          | 7 | 9 | 4963.57 | 4963.54 | 1.00 | 0.11 | 0.95 | 0.05 | 3 |
| Thymosin beta-4 | Cyto | Entire protein                 | Ac-SDKPDMAEIEKFDKSKLKKTTETQEKNPLPSKETIEQE KQAGES     | Amygdala          | 8 | 9 | 4962.39 | 4963.54 | 1.00 | 0.04 | 0.94 | 0.03 | 3 |
| Thymosin beta-4 | Cyto | Entire protein                 | Ac-SDKPDMAEIEKFDKSKLKKTTETQEKNPLPSKETIEQE KQAGES     | Amygdala          | 8 | 9 | 4963.51 | 4963.54 | 1.00 | 0.12 | 1.01 | 0.12 | 3 |
| Thymosin beta-4 | Cyto | Entire protein                 | Ac-SDKPDMAEIEKFDKSKLKKTTETQEKNPLPSKETIEQE KQAGES     | Amygdala          | 9 | 9 | 4962.68 | 4963.54 | 1.00 | 0.09 | 0.98 | 0.02 | 3 |
| Thymosin beta-4 | Cyto | Entire protein                 | Ac-SDKPDMAEIEKFDKSKLKKTTETQEKNPLPSKETIEQE KQAGES     | Amygdala          | 9 | 9 | 4963.22 | 4963.54 | 1.01 | 0.18 | 1.04 | 0.04 | 3 |
| Thymosin beta-4 | Cyto | Entire protein                 | Ac-SDKPDMAEIEKFDKSKLKKTTETQEKNPLPSKETIEQE KQAGES     | Cortex            | 6 | 9 | 4962.69 | 4963.54 | 1.01 | 0.18 | 0.85 | 0.23 | 3 |
| Thymosin beta-4 | Cyto | Entire protein                 | Ac-SDKPDMAEIEKFDKSKLKKTTETQEKNPLPSKETIEQE KQAGES     | Cortex            | 7 | 9 | 4963.68 | 4963.54 | 1.01 | 0.19 | 0.90 | 0.12 | 3 |
| Thymosin beta-4 | Cyto | Entire protein                 | Ac-SDKPDMAEIEKFDKSKLKKTTETQEKNPLPSKETIEQE KQAGES     | Cortex            | 8 | 9 | 4963.20 | 4963.54 | 1.02 | 0.26 | 1.14 | 0.29 | 3 |
| Thymosin beta-4 | Cyto | Entire protein                 | Ac-SDKPDMAEIEKFDKSKLKKTTETQEKNPLPSKETIEQE KQAGES     | Cortex            | 9 | 9 | 4961.55 | 4963.54 | 1.00 | 0.04 | 0.95 | 0.01 | 3 |
| Thymosin beta-4 | Cyto | Entire protein                 | Ac-SDKPDMAEIEKFDKSKLKKTTETQEKNPLPSKETIEQE KQAGES     | Hypothalamus      | 6 | 9 | 4963.54 | 4963.54 | 1.00 | 0.04 | 0.91 | 0.06 | 3 |
| Thymosin beta-4 | Cyto | Entire protein                 | Ac-SDKPDMAEIEKFDKSKLKKTTETQEKNPLPSKETIEQE KQAGES     | Hypothalamus      | 7 | 9 | 4963.37 | 4963.54 | 1.00 | 0.07 | 0.85 | 0.09 | 3 |
| Thymosin beta-4 | Cyto | Entire protein                 | Ac-SDKPDMAEIEKFDKSKLKKTTETQEKNPLPSKETIEQE KQAGES     | Hypothalamus      | 8 | 9 | 4963.35 | 4963.54 | 1.00 | 0.01 | 0.90 | 0.10 | 3 |
| Thymosin beta-4 | Cyto | Entire protein                 | Ac-SDKPDMAEIEKFDKSKLKKTTETQEKNPLPSKETIEQE KQAGES     | Hypothalamus      | 9 | 9 | 4963.28 | 4963.54 | 1.00 | 0.02 | 0.90 | 0.11 | 3 |
| Thymosin beta-4 | Cyto | Entire protein                 | Ac-SDKPDMAEIEKFDKSKLKKTTETQEKNPLPSKETIEQE KQAGES     | Prefrontal Cortex | 8 | 9 | 4963.89 | 4963.54 | 1.02 | 0.24 | 1.00 | 0.04 | 3 |
| Thymosin beta-4 | Cyto | Entire protein +16 (Met oxide) | (Ac-SDKPDMoxAEIEKFDKSKLKKTTETQEKNPLPSKETIEQE KQAGES) | Amygdala          | 6 | 9 | 4979.51 | 4979.54 | 1.00 | 0.01 | 0.83 | 0.00 | 3 |
| Thymosin beta-4 | Cyto | Entire protein +16 (Met oxide) | (Ac-SDKPDMoxAEIEKFDKSKLKKTTETQEKNPLPSKETIEQE KQAGES) | Amygdala          | 7 | 9 | 4979.62 | 4979.54 | 1.01 | 0.12 | 0.82 | 0.12 | 3 |
| Thymosin beta-4 | Cyto | Entire protein +16 (Met oxide) | (Ac-SDKPDMoxAEIEKFDKSKLKKTTETQEKNPLPSKETIEQE KQAGES) | Amygdala          | 8 | 9 | 4979.24 | 4979.54 | 1.00 | 0.08 | 0.93 | 0.05 | 3 |
| Thymosin beta-4 | Cyto | Entire protein +16 (Met oxide) | (Ac-SDKPDMoxAEIEKFDKSKLKKTTETQEKNPLPSKETIEQE KQAGES) | Cortex            | 6 | 9 | 4979.23 | 4979.54 | 1.00 | 0.06 | 0.73 | 0.01 | 3 |
| Thymosin beta-4 | Cyto | Entire                         | (Ac-SDKPDMoxAEIEKFDKSKLKKTTETQEKNPLPSKETIEQE KQAGES) | Cortex            | 7 | 9 | 4979.16 | 4979.54 | 1.01 | 0.14 | 1.08 | 0.15 | 3 |

|                                                         |      |                                |                                                      |              |   |   |         |         |      |      |      |      |   |  |
|---------------------------------------------------------|------|--------------------------------|------------------------------------------------------|--------------|---|---|---------|---------|------|------|------|------|---|--|
|                                                         |      | protein +16 (Met oxide)        | QEKQAGES)                                            |              |   |   |         |         |      |      |      |      |   |  |
| Thymosin beta-4                                         | Cyto | Entire protein +16 (Met oxide) | (Ac-SDKPDMoxAEIEKFDKSKLKKTTETQEKNPLPSKETIE QEKQAGES) | Cortex       | 8 | 9 | 4979.01 | 4979.54 | 1.00 | 0.05 | 0.90 | 0.09 | 3 |  |
| Thymosin beta-4                                         | Cyto | Entire protein +16 (Met oxide) | (Ac-SDKPDMoxAEIEKFDKSKLKKTTETQEKNPLPSKETIE QEKQAGES) | Cortex       | 9 | 9 | 4979.58 | 4979.54 | 1.03 | 0.33 | 0.98 | 0.12 | 3 |  |
| Thymosin beta-4                                         | Cyto | Entire protein +16 (Met oxide) | (Ac-SDKPDMoxAEIEKFDKSKLKKTTETQEKNPLPSKETIE QEKQAGES) | Hypothalamus | 7 | 9 | 4979.77 | 4979.54 | 1.00 | 0.06 | 0.81 | 0.04 | 3 |  |
| Thymosin beta-4                                         | Cyto | Entire protein +16 (Met oxide) | (Ac-SDKPDMoxAEIEKFDKSKLKKTTETQEKNPLPSKETIE QEKQAGES) | Hypothalamus | 8 | 9 | 4979.51 | 4979.54 | 1.01 | 0.16 | 0.75 | 0.02 | 3 |  |
| Tubulin beta                                            | Cyto | N-term                         | REIVH(I/L)QA                                         | Cortex       | 3 | 1 | 964.55  | 964.55  | nd   |      | >5   |      | 5 |  |
| Tubulin beta                                            | Cyto | N-term                         | REIVH(I/L)QA                                         | Striatum     | 3 | 1 | 964.56  | 964.55  | nd   |      | >5   |      | 5 |  |
| Tubulin beta                                            | Cyto | 56-66                          | GNKYVPRAILV                                          | Cortex       | 3 | 2 | 1228.76 | 1228.73 | nd   |      | >5   |      | 5 |  |
| Tubulin beta                                            | Cyto | N-term                         | MREIVH(I/L)QAGQ                                      | Hypothalamus | 3 | 1 | 1280.67 | 1280.67 | 1.05 | 0.37 | 1.69 | 0.10 | 4 |  |
| Tubulin beta                                            | Cyto | 55-66                          | AGNKYVPRAILV                                         | Cortex       | 3 | 2 | 1299.82 | 1299.77 | nd   |      | >5   |      | 5 |  |
| Tubulin beta                                            | Cyto | 79-90                          | GPFQ(I/L)FRPDNF                                      | Amygdala     | 2 | 1 | 1393.74 | 1393.68 | nd   |      | >5   |      | 5 |  |
| Tubulin beta                                            | Cyto | 78-90                          | SGPFGQ(I/L)FRPDNF                                    | Hypothalamus | 2 | 1 | 1480.71 | 1480.71 | nd   |      | >5   |      | 5 |  |
| Tubulin beta                                            | Cyto | 78-90                          | SGPFGQ(I/L)FRPDNF                                    | Amygdala     | 2 | 1 | 1480.74 | 1480.71 | nd   |      | >5   |      | 5 |  |
| Tubulin beta                                            | Cyto | 77-90                          | RSGPFGQ(I/L)FRPDNF                                   | Amygdala     | 3 | 1 | 1636.78 | 1636.81 | nd   |      | >5   |      | 5 |  |
| Tubulin beta                                            | Cyto | 77-90                          | RSGPFGQ(I/L)FRPDNF                                   | Amygdala     | 3 | 1 | 1636.88 | 1636.81 | nd   |      | >3   |      | 5 |  |
| Tubulin beta                                            | Cyto | N-term                         | MREIVH(I/L)QAGQC+ Glutathione                        | Hypothalamus | 4 | 2 | 1688.78 | 1688.76 | 1.34 | 0.96 | 3.04 | 0.04 | 5 |  |
| Tubulin beta                                            | Cyto | 168-185                        | SVVSPKVSSTVVEPYNA                                    | Amygdala     | 2 | 1 | 1886.91 | 1886.96 | nd   |      | >5   |      | 5 |  |
| Tubulin beta                                            | Cyto | 168-185                        | SVVSPKVSSTVVEPYNA                                    | Hypothalamus | 2 | 2 | 1886.96 | 1886.96 | nd   |      | >5   |      | 5 |  |
| Tubulin beta                                            | Cyto | 168-185                        | SVVSPKVSSTVVEPYNA                                    | Hypothalamus | 3 | 2 | 1886.96 | 1886.96 | nd   |      | >5   |      | 5 |  |
| Tubulin beta                                            | Cyto | 55-76                          | AGNKYVPRAILVDLEPGTMDSV                               | Amygdala     | 3 | 1 | 2344.25 | 2344.21 | nd   |      | >5   |      | 5 |  |
| Tubulin beta                                            | Cyto | 55-76                          | AGNKYVPRAILVDLEPGTMDSV                               | Hypothalamus | 3 | 2 | 2344.21 | 2344.21 | nd   |      | >5   |      | 5 |  |
| Ubiquinol-cytochrome c reductase complex 11 kDa protein | Mito | N-term                         | GDPKEEEEEELVDPLTTVREH                                | Hypothalamus | 3 | 2 | 2450.14 | 2450.15 | 1.14 | 0.70 | 0.68 | 0.03 | 3 |  |
| Ubiquinol-cytochrome c reductase complex 11 kDa protein | Mito | N-term                         | GDPKEEEEEELVDPLTTVREH                                | Hypothalamus | 4 | 1 | 2450.20 | 2450.15 | 1.13 | 0.68 | 1.24 | 0.03 | 3 |  |
| Ubiquinol-cytochrome c reductase complex 11 kDa         | Mito | N-term                         | GDPKEEEEEELVDPLTTVREH                                | Hypothalamus | 4 | 2 | 2450.13 | 2450.15 | 1.06 | 0.42 | 0.52 | 0.00 | 2 |  |



| protein                                                 |      |        |                       |                   |   |   |         |         |      |      |      |      |   |  |
|---------------------------------------------------------|------|--------|-----------------------|-------------------|---|---|---------|---------|------|------|------|------|---|--|
| Ubiquinol-cytochrome c reductase complex 11 kDa protein | Mito | N-term | GDPKEEEEEELVDPLTTVREH | Hypothalamus      | 4 | 2 | 2450.14 | 2450.15 | 1.20 | 0.86 | 0.59 | 0.02 | 2 |  |
| Ubiquinol-cytochrome c reductase complex 11 kDa protein | Mito | N-term | GDPKEEEEEELVDPLTTVREH | Prefrontal Cortex | 4 | 2 | 2450.17 | 2450.15 | 1.20 | 0.87 | 1.10 | 0.26 | 3 |  |
| Ubiquinol-cytochrome C reductase complex 14 kDa protein | Mito | N-term | Ac-AGRSAVSASSK        | Prefrontal Cortex | 2 | 1 | 1061.55 | 1061.55 | nd   |      | >3   |      | 5 |  |
| Ubiquinol-cytochrome c reductase iron-sulfur subunit    | Mito | 62-68  | RPLVATV               | Hypothalamus      | 2 | 1 | 754.44  | 754.47  | nd   |      | >5   |      | 5 |  |
| Ubiquinol-cytochrome c reductase iron-sulfur subunit    | Mito | 62-68  | RPLVATV               | Hypothalamus      | 2 | 1 | 754.46  | 754.47  | nd   |      | >5   |      | 5 |  |
| Ubiquinol-cytochrome c reductase iron-sulfur subunit    | Mito | 62-68  | RPLVATV               | Prefrontal Cortex | 2 | 1 | 754.44  | 754.47  | nd   |      | >3   |      | 5 |  |
| Ubiquinol-cytochrome c reductase iron-sulfur subunit    | Mito | 69-77  | GLNVPASVR             | Cortex            | 2 | 1 | 911.53  | 911.52  | nd   |      | >5   |      | 5 |  |
| Ubiquinol-cytochrome c reductase iron-sulfur subunit    | Mito | 69-77  | GLNVPASVR             | Prefrontal Cortex | 2 | 1 | 911.51  | 911.52  | nd   |      | >3   |      | 5 |  |
| Ubiquinol-cytochrome c reductase iron-sulfur subunit    | Mito | 69-77  | GLNVPASVR             | Striatum          | 2 | 1 | 911.51  | 911.52  | nd   |      | >5   |      | 5 |  |
| Ubiquinol-cytochrome c reductase iron-sulfur subunit    | Mito | 18-27  | TSRGVAGALR            | Striatum          | 3 | 1 | 986.58  | 986.56  | nd   |      | >5   |      | 5 |  |
| Ubiquinol-cytochrome c reductase iron-sulfur subunit    | Mito | 69-78  | GLNVPASVRF            | Amygdala          | 2 | 1 | 1058.57 | 1058.59 | nd   |      | >5   |      | 5 |  |
| Ubiquinol-cytochrome c reductase iron-sulfur subunit    | Mito | 69-78  | GLNVPASVRF            | Amygdala          | 2 | 1 | 1058.60 | 1058.59 | nd   |      | >3   |      | 5 |  |
| Ubiquinol-cytochrome c reductase iron-sulfur subunit    | Mito | 69-78  | GLNVPASVRF            | Cortex            | 2 | 1 | 1058.55 | 1058.59 | nd   |      | >5   |      | 5 |  |
| Ubiquinol-cytochrome c reductase iron-sulfur subunit    | Mito | 69-78  | GLNVPASVRF            | Hypothalamus      | 2 | 1 | 1058.57 | 1058.59 | nd   |      | >5   |      | 5 |  |
| Ubiquinol-cytochrome c reductase iron-sulfur subunit    | Mito | 69-78  | GLNVPASVRF            | Hypothalamus      | 2 | 1 | 1058.59 | 1058.59 | nd   |      | >5   |      | 5 |  |
| Ubiquinol-cytochrome c reductase iron-sulfur subunit    | Mito | 69-78  | GLNVPASVRF            | Striatum          | 2 | 1 | 1058.55 | 1058.59 | nd   |      | >5   |      | 5 |  |
| Ubiquinol-cytochrome c reductase iron-sulfur subunit    | Mito | 6-17   | ARSGPFAPVLSA          | Cortex            | 2 | 1 | 1171.70 | 1171.63 | nd   |      | >3   |      | 5 |  |



|                                                      |      |        |                                         |              |   |   |         |         |      |      |      |      |   |
|------------------------------------------------------|------|--------|-----------------------------------------|--------------|---|---|---------|---------|------|------|------|------|---|
| Ubiquinol-cytochrome c reductase iron-sulfur subunit | Mito | 6-17   | ARSGPFAPVLSA                            | Hypothalamus | 2 | 1 | 1171.63 | 1171.63 | nd   |      | >5   |      | 5 |
| Ubiquinol-cytochrome c reductase iron-sulfur subunit | Mito | 56-68  | SGQAAARPLVATV                           | Amygdala     | 2 | 1 | 1239.71 | 1239.69 | nd   |      | >5   |      | 5 |
| Ubiquinol-cytochrome c reductase iron-sulfur subunit | Mito | 56-68  | SGQAAARPLVATV                           | Cortex       | 2 | 1 | 1239.76 | 1239.69 | nd   |      | >5   |      | 5 |
| Ubiquinol-cytochrome c reductase iron-sulfur subunit | Mito | 56-68  | SGQAAARPLVATV                           | Hypothalamus | 3 | 1 | 1239.66 | 1239.69 | 1.16 | 0.72 | 1.53 | 0.43 | 4 |
| Ubiquinol-cytochrome c reductase iron-sulfur subunit | Mito | 56-68  | SGQAAARPLVATV                           | Hypothalamus | 3 | 2 | 1239.69 | 1239.69 | nd   |      | >5   |      | 5 |
| Ubiquinol-cytochrome c reductase iron-sulfur subunit | Mito | 56-68  | SGQAAARPLVATV                           | Striatum     | 2 | 1 | 1239.68 | 1239.69 | nd   |      | >5   |      | 5 |
| Ubiquinol-cytochrome c reductase iron-sulfur subunit | Mito | 6-18   | ARSGPFAPVLSAT                           | Cortex       | 2 | 1 | 1272.72 | 1272.68 | nd   |      | >3   |      | 5 |
| Ubiquinol-cytochrome c reductase iron-sulfur subunit | Mito | 52-68  | RESLSGQAAARPLVATV                       | Striatum     | 3 | 1 | 1724.99 | 1724.95 | nd   |      | >5   |      | 5 |
| Vacuolar proton pump subunit F                       | Lyso | N-term | Ac-AGRGKLIAVIGDEDTVTGFLGGIGELNKNRHPNFLV | Amygdala     | 5 | 2 | 4031.06 | 4031.20 | nd   |      | >5   |      | 5 |
| Vacuolar proton pump subunit G 2                     | Lyso | C-term | EVRPQVHPNYRVTV                          | Amygdala     | 4 | 1 | 1692.88 | 1692.91 | nd   |      | >5   |      | 5 |
| Vacuolar proton pump subunit G 2                     | Lyso | C-term | EVRPQVHPNYRVTV                          | Amygdala     | 4 | 1 | 1692.95 | 1692.91 | nd   |      | >5   |      | 5 |
| Vacuolar proton pump subunit G 2                     | Lyso | C-term | EVRPQVHPNYRVTV                          | Cortex       | 3 | 1 | 1692.93 | 1692.91 | nd   |      | >5   |      | 5 |
| Vacuolar proton pump subunit G 2                     | Lyso | C-term | EVRPQVHPNYRVTV                          | Cortex       | 4 | 1 | 1692.92 | 1692.91 | nd   |      | >5   |      | 5 |
| Vacuolar proton pump subunit G 2                     | Lyso | C-term | EVRPQVHPNYRVTV                          | Hypothalamus | 3 | 1 | 1692.91 | 1692.91 | nd   |      | >5   |      | 5 |
| Vacuolar proton pump subunit G 2                     | Lyso | C-term | EVRPQVHPNYRVTV                          | Hypothalamus | 4 | 1 | 1692.91 | 1692.91 | nd   |      | >5   |      | 5 |
| Vacuolar proton pump subunit G 2                     | Lyso | C-term | EVRPQVHPNYRVTV                          | Striatum     | 4 | 1 | 1692.92 | 1692.91 | nd   |      | >5   |      | 5 |

Table S-2 (supplement). Amino acid levels in WT and *pcd* mouse brain regions.

| Amino acid | Amygdala |       |            |       |                |       | Cortex |       |            |       |                |        | Hypothalamus |       |            |       |                |       |       |       |      |
|------------|----------|-------|------------|-------|----------------|-------|--------|-------|------------|-------|----------------|--------|--------------|-------|------------|-------|----------------|-------|-------|-------|------|
|            | WT       |       | <i>pcd</i> |       | <i>pcd</i> /WT |       | WT     |       | <i>pcd</i> |       | <i>pcd</i> /WT |        | WT           |       | <i>pcd</i> |       | <i>pcd</i> /WT |       |       |       |      |
|            | Avg      | SEM   | Avg        | SEM   | SEM            | 97%   | Avg    | SEM   | Avg        | SEM   | SEM            | 103%   | Avg          | SEM   | Avg        | SEM   | Avg            | SEM   | 92%   |       |      |
| A          | 0.65     | 0.02  | 0.63       | 0.04  | 0.04           | 97%   | 0.72   | 0.07  | 0.74       | 0.05  | 0.05           | 103%   | 0.39         | 0.03  | 0.35       | 0.03  | 0.39           | 0.03  | 0.35  | 0.03  | 92%  |
| D          | 2.32     | 0.03  | 1.97       | 0.04  | 0.04           | **85% | 2.75   | 0.22  | 2.54       | 0.13  | 0.13           | 92%    | 2.76         | 0.10  | 2.39       | 0.11  | 2.76           | 0.10  | 2.39  | 0.11  | 87%  |
| E          | 11.30    | 0.18  | 10.45      | 0.51  | 0.51           | 92%   | 10.21  | 0.61  | 10.53      | 0.53  | 0.53           | 103%   | 8.47         | 0.26  | 7.50       | 0.36  | 8.47           | 0.26  | 7.50  | 0.36  | 89%  |
| F          | 0.45     | 0.05  | 0.39       | 0.03  | 0.03           | 88%   | 0.27   | 0.02  | 0.36       | 0.03  | 0.03           | 132%   | 0.46         | 0.05  | 0.37       | 0.03  | 0.46           | 0.05  | 0.37  | 0.03  | 80%  |
| G          | 0.62     | 0.03  | 0.58       | 0.04  | 0.04           | 94%   | 0.56   | 0.05  | 0.89       | 0.05  | 0.05           | **158% | 1.04         | 0.07  | 0.95       | 0.06  | 1.04           | 0.07  | 0.95  | 0.06  | 92%  |
| H          | 1.13     | 0.27  | 0.92       | 0.08  | 0.08           | 82%   | 0.96   | 0.03  | 1.32       | 0.18  | 0.18           | 138%   | 1.45         | 0.47  | 1.26       | 0.22  | 1.45           | 0.47  | 1.26  | 0.22  | 87%  |
| I          | 0.008    | 0.003 | 0.010      | 0.000 | 0.000          | 130%  | 0.010  | 0.004 | ND         |       |                |        | 0.015        | 0.006 | 0.010      | 0.004 | 0.015          | 0.006 | 0.010 | 0.004 | 67%  |
| K          | 0.60     | 0.31  | 0.28       | 0.02  | 0.02           | 46%   | 0.13   | 0.09  | 0.23       | 0.13  | 0.13           | 180%   | 0.44         | 0.07  | 0.38       | 0.03  | 0.44           | 0.07  | 0.38  | 0.03  | 86%  |
| L          | 0.070    | 0.004 | 0.065      | 0.009 | 0.009          | 93%   | 0.093  | 0.01  | 0.085      | 0.006 | 0.006          | 92%    | 0.075        | 0.006 | 0.065      | 0.009 | 0.075          | 0.006 | 0.065 | 0.009 | 87%  |
| M          | 0.053    | 0.005 | 0.060      | 0.020 | 0.020          | 114%  | 0.051  | 0.007 | 0.055      | 0.020 | 0.020          | 108%   | 0.048        | 0.005 | 0.055      | 0.024 | 0.048          | 0.005 | 0.055 | 0.024 | 116% |
| P          | 0.068    | 0.005 | 0.073      | 0.006 | 0.006          | 107%  | 0.050  | 0.004 | 0.058      | 0.005 | 0.005          | 115%   | 0.063        | 0.005 | 0.071      | 0.008 | 0.063          | 0.005 | 0.071 | 0.008 | 113% |
| R          | 1.25     | 0.82  | 0.49       | 0.08  | 0.08           | 39%   | 2.33   | 1.04  | 0.85       | 0.06  | 0.06           | 36%    | 0.68         | 0.15  | 0.57       | 0.05  | 0.68           | 0.15  | 0.57  | 0.05  | 84%  |
| S          | 1.57     | 0.10  | 1.48       | 0.12  | 0.12           | 94%   | 0.92   | 0.13  | 1.36       | 0.14  | 0.14           | 147%   | 1.00         | 0.11  | 0.83       | 0.10  | 1.00           | 0.11  | 0.83  | 0.10  | 82%  |
| T          | 0.47     | 0.06  | 0.61       | 0.08  | 0.08           | 129%  | 1.29   | 0.12  | 0.86       | 0.17  | 0.17           | 66%    | 1.08         | 0.10  | 1.00       | 0.16  | 1.08           | 0.10  | 1.00  | 0.16  | 92%  |
| V          | 0.10     | 0.01  | 0.10       | 0.01  | 0.01           | 100%  | 0.11   | 0.01  | 0.11       | 0.01  | 0.01           | 104%   | 0.11         | 0.01  | 0.10       | 0.01  | 0.11           | 0.01  | 0.10  | 0.01  | 88%  |
| total      | 20.67    | 1.55  | 18.14      | 0.76  | 0.76           | 88%   | 20.46  | 1.96  | 19.98      | 1.11  | 1.11           | 98%    | 18.08        | 1.06  | 16.11      | 0.82  | 18.08          | 1.06  | 16.11 | 0.82  | 89%  |

Units are nmol/mg protein

\*\*, the difference between WT and *pcd* mice is statistically significant,  $p < 0.01$  using Student's t-test ( $n=4$ ).
